# Supplementary material for: Population Genetics of the Developmental Gene optomotor-blind (omb) in Drosophila polymorpha
Source: Oxford University Press journal article supplement (doi:10.1534/genetics.104.032078), 2004-12-01
Supplement: copy_of_suppmat.xls [file copy_of_suppmat.xls]

#NEXUS 

BEGIN DATA;
	DIMENSIONS  NTAX=120 NCHAR=750;
	FORMAT DATATYPE=DNA  MISSING=? GAP=- ;
	[D. polymorpha omb haplotypes culled of unalignable regions]
MATRIX
phenotype1popS       AGCGTCTCGTCGCTGTTGACGGCGGGTAGCAACAACAACAACAGTACTAACGGTAGCCCAGCAGCAGCAGCGACGGCAGCAGCAGCAGCGGCGGCTCAGGCCTTAAGCTCACCAGATTCTGGAGCTGGCAATTATCGTAGCTCGCCGTCGCAGCTATCGCCACAAAgTAATCACAGCAATaaTAACAACAGTACTAACAACAACAACAACAACAACAATAGCAAAAATCACGAAGCTTTGAGCGCCTCACCCACAACAACAACAACAAATCGAACCACACCAACAACAACACCGCCAACACCACCGCCACAAGCAAGTGGAGCGCCAGCGCCACCACCACCACCGCCGTCGTCGTCGTCGTCATTACCCGCGCATCATTCGCCCAGCGTCGCACCGCCACCGCCACCGCCACCACAGCAGCAGCCGCAACCGCTGCATGCAGCACAGCATTTGGCGCAGCAGCAACAACAGCAATCACAGCAACCGCCACCGCCGCCATACTTTCCGGCTGCAGCATTAGCTGCTTTGGCTGGCAGTCCGGCGGGACCGCATCATCCGGGTCTTTATAGCGCCGCGGGCGGTTTGCGTTTCCCGCCGCATCCAGCGCATCCGCATCCGCATTCGCATCCGCACGCCCACCATCCGCTGGGCAGTGCGTATACCACCGCCGAGGACGTGGTCCTCGCATCGGCCGTTGCCCATCAGCTGCATCCGGCGATGCGACCTCTGCGCGCCCTACAGCCCGAGGAC
phenotype2popS       AGCGTCTCGTCGCTGTtGACGGCGGGTAGCAACAACAACAACAGTATTAACGGTAGCGCAGCAGCAGCAGCGACGGCAGCAGCAGCAGCGGCAGCTCAgGCCTTAAGCTCACCAGATTCTGGAGCTGGCAATTATCGTAGCTCGCCGTCGCAGCTATCGCCACAAAGTAATCACAGCAATaaTAACAaCAGTACTAACAACAACAACAACAACAACAATAGCAAAAATCACGAAGCTTTGAGCGTCTCACCCACAACAACAACAACAAATCGAACCACACCAACAACAACACCGCCAACACCACCGCCACAAGCAAGTGGAGCGCCAGCGCCACCACCACCACCGCCGTCGTCGTCGTCGTCATTACCCGCGCATCATTCGCCCAGCGTCGCACCGCCACCGCCACCGCCACCACAGCAGCAGCCGCAACCGCTGCATGCAGCACAGCATTTGGCGCAGCAGCAACAACAGCAAGCACAGCAACCGCCACCGCCGCCATACTTTCCGGCCGCAGCATTAGCTGCTTTGGCTGGCAGTCCGGCGGGACCGCATCATCCGGGTCTTTATAGCGCCGCGGGCGGTTTGCGTTTCCCGCCGCATCCAGGGCATCCGCATCCGCATTCGCATCCGCACGCCCACCATCCGCTGGGCAGTGCGTATACCaCCGCCGAGGACGTGGTCCTCGCATCGGCCGTTGCCCATCAGCTGCATCCGGCGATGCGACCTCTGCGCGCCCTTCAGCCCGAGGAC
phenotype3popS       AGCGTCTCGTCGCTGTTGACGGCGGGTAGCAACAACAACAACAGTACTAACGGTAGCCCAGCAGCAGCAGCGACGGCAGCAGCAGCAGCGGCGGCTCAGGCCTTAAGCTCACCAGATTCTGGAGCTGGCAATTATCGTAGCTCGCCGTCGCAGCTATCGCCACaAAGTAATCACAGCAATaaTAACAACAGTACTAACAACAACAACAACAACAACAATAGCAAAAATCACGAAGCTTTGAGCGCCTCACCCACAACAACAACAACAAATCGAACCACACCAACAACAACACCGCCAACACCACCGCCACAAGCAAGTGGAGCGCCAGCGCCACCACCACCACCGCCGTCGTCGTCGTCGTCATTACCCGCGCATCATTCGCCCAGCGTCGCACCGCCACCGCCACCGCCACCACAGCAGCAGCCGCAACCGCTGCATGCAGCACAGCATTTGGCGCAGCAGCAACAACAGCAATCACAGCAACCGCCACCGCCGCCATACTTTCCGGCTGCAGCATTAGCTGCTTTGGCTGGCAGTCCGGCGGGACCGCATCATCCGGGTCTTTATAGCGCCGCGGGCGGTTTGCGTTTCCCGCCGCATCCAGCGCATCCGCATCCGCATTCGCATCCGCACGCCCACCATCCGCTGGGCAGTGCGTATACCACCGCCGAGGACGTGGTCCTCGCATCGGCCGTTGCCCATCAGCTGCATCCGGCGATGCGACCTCTGCGCGCCCTACAGCCCGAGGAC
phenotype3popS       AGCGTCTCGTCGCTGTTGACGGCGGGTAGCAACAACAACAACAGTACTAACGGTAGCCCAGCAGCAGCAGCGACGGCAGCAGCAGCAGCGGCGGCTCAGGCCTTAAGCTCACCAGATTCTGGAGCTGGCAATTATCGTAGCTCGCCGTCGCAGCTATCGCCACAAAgTAATCACAGCAATaaTAACAACAGTACTAACAACAACAACAACAACAACAATAGCAAAAATCACGAAGCTTTGAGCGCCTCACCCACAACAACAACAACAAATCGAACCACACCAACAACAACACCGCCAACACCACCGCCACAAGCAAGTGGAGCGCCAGCGCCACCACCACCACCGCCGTCGTCGTCGTCGTCATTACCCGCGCATCATTCGCCCAGCGTCGCACCGCCACCGCCACCGCCACCACAGCAGCAGCCGCAACCGCTGCATGCAGCACAGCATTTGGCGCAGCAGCAACAACAGCAATCACAGCAACCGCCACCGCCGCCATACTTTCCGGCTGCAGCATTAGCTGCTTTGGCTGGCAGTCCGGCGGGACCGCATCATCCGGGTCTTTATAGCGCCGCGGGCGGTTTGCGTTTCCCGCCGCATCCAGCGCATCCGCATCCGCATTCGCATCCGCACGCCCACCATCCGCTGGGCAGTGCGTATACCACCGCCGAGGACGTGGTCCTCGCATCGGCCGTTGCCCATCAGCTGCaTCCGGCGATGCGACcTCTGCGCGCCCTACAGCCCGAGGAC
phenotype3popS       AGCGTCTCGTCGCTGTTGACGGCGGGTAGCAACAACAACAACAGTACTAACGGTAGCCCAGCAGCAGCAGCGACGGCAGCAGCAGCAGCGGCGGCTCAGGCCTTAAGCTCACCAGATTCTGGAGCTGGCAATTATCGTAGCTCGCCGTCGCAGCTATCGCCACAAAgTAATCACAGCAATaaTAACAACAGTACTAACAACAACAACAACAACAACAATAGCAAAAATCACGAAGCTTTGAGCGCCTCACCCACAACAACAACAACAAATCGAACCACACCAACAACGACACCGCCAACACCACCGCCACAAGCAAGTGGAGCGCCAGCGCCACCACCACCACCGCCGTCGTCGTCGTCGTCATTACCCGCGCATCATTCGCCCAGCGTCGCACCGCCACCGCCACCGCCACCACAGCAGCAGCCGCAACCGCTGCATGCAGCACAGCATTTGGCGCAGCAGCAACAACAGCAATCACAGCAACCGCCACCGCCGCCATACTTTCCGGCTGCAGCATTAGCTGCTTTGGCTGGCAGTCCGGCGGGACCGCATCATCCGGGTCTTTATAGCGCCGCGGGCGGTTTGCGTTTCCCGCCGCATCCAGCGCATCCGCATCCGCATTCGCATCCGCACGCCCACCATCCGCTGGGCAGTGCGTATACCACCGCCGAGGACGTGGTCCTCGCATCGGCCGTTGCCCATCAGCTGCATCCGGCGATGCGACCTCTGCGCGCCCTACAGCCCGAGGAC
phenotype3popS       AGCGTCTCGTCGCTGTTGACGGCGGGTAGCAACAACAACAACAGTACTAACGGTAGCCCAGCAGCAGCAGCGACGGCAGCAGCAGCAGCGGCGGCTCAgGCCTTAAGCTCACCAGATTCTGGAGCTGGCAATTATCGTAGCTCGCCGTCGCAGCTATCGCCACAAAgTAATCACAGCAATaaTAACAACAGTACTAACAACAACAACAACAACAACAATAGCAAAAATCACGAAGCTTTGAGCGCCTCACCCACAACAACAACAACAAATCGAACCACACCAACAACAACACCGCCAACACCACCGCCACAAGCAAGTGGAGCGCCAGCGCCACCACCACCACCGCCGTCGTCGTCGTCGTCATTACCCGCGCATCATTCGCCCAGCGTCGCACCGCCACCGCCACCGCCACCACAGCAGCAGCCGCAACCGCTGCATGCAGCACAGCATTTGGCGCAGCAGCAACAACAGCAATCACAGCAACCGCCACCGCCGCCATACTTTCCGGCTGCAGCATTAGCTGCTTTGGCTGGCAGTCCGGCGGGACCGCATCATCCGGGTCTTTATAGCGCCGCGGGCGGTTTGCGTTTCCCGCCGCATCCAGCGCATCCGCATCCGCATTCGCATCCGCACGCCCACCATCCGCTGGGCAGTGCGTATACCACCGCCGAGGACGTGGTCCTCGCATCGGCCGTTGCCCATCAGCTGCATCCGGCGATGCGACCTCTGCGCGCCCTACAGCCCGAGGAC
phenotype3popS       AGCGTCTCGTCGCTGTTGACGGCGGGTAGCAACAACAACAACAGTACTAACGGTAGCCCAGCAGCAGCAGCGACGGCAGCAGCAGCAGCGGCGGCTCAGGCCTTAAGCTCACCAGATTCTGGAGCTGGCAATTATCGTAGCTCGCCGTCGCAGCTATCGCCACAAAgTAATCACAGCAATaaTAACAACAGTACTAACAACAACAACAACAACAACAATAGCAAAAATCACGAAGCTTTGAGCGCCTCACCCACAACAACAACAACAAATCGAACCACACCAACAACAACACCGCCAACACCACCGCCACAAGCAAGTGGAGCGCCAGCGCCACCACCACCACCGCCGTCGTCGTCGTCGTCATTACCCGCGCATCATTCGCCCAGCGTCGCACCGCCACCGCCACCGCCACCACAGCAGCAGCCGCAACCGCTGCATGCAGCACAGCATTTGGCGCAGCAGCAACAACAGCAATCACAGCAACCGCCACCGCCGCCATACTTTCCGGCTGCAGCATTAGCTGCTTTGGCTGGCAGTCCGGCGGGACCGCATCATCCGGGTCTTTATAGCGCCGCGGGCGGTTTGCGTTTCCCGCCGCATCCAGCGCATCCGCATCCGCATTCGCATCCGCACGCCCACCATCCGCTGGGCAGTGCGTATACCACCGCCGAGGACGTGGTCCTCGCATCGGCCGTTGCCCATCAGCTGCATCCGGCGATGCGACCTCTGCGCGCCCTACAGCCCGAGGAC
phenotype3popS       AGCGTCTCGTCGCTGTTGACGGCGGGTAGCAACAACAACAACAGTACTAACGGTAGCCCAGCAGCAGCAGCGACGGCAGCAGCAGCAGCGGCGGCTCAGGCCTTAAGCTCACCAGATTCTGGAGCTGGCAATTATCGTAGCTCGCCGTCGCAGCTATCGcCACAAAGTAATCACAGCAATaaTAACAACAGTACTAACAACAACAACAACAACAACAATAGCAAAAATCACGAAGCTTTGAGCGCCTCACCCACAACAACAACAACAAATCGAACCACACCAACAACAACACCGCCAACACCACCGCCACAAGCAAGTGGAGCGCCAGCGCCACCACCACCACCGCCGTCGTCGTCGTCGTCATTACCCGCGCATCATTCGCCCAGCGTCGCACCGCCACCGCCACCGCCACCACAGCAGCAGCCGCAACCGCTGCATGCAGCACAGCATTTGGCGCAGCAGCAACAACAGCAATCACAGCAACCGCCACCGCCGCCATACTTTCCGGCTGCAGCATTAGCTGCTTTGGCTGGCAGTCCGGCGGGACCGCATCATCCGGGTCTTTATAGCGCCGCGGGCGGTTTGCGTTTCCCGCCGCATCCaGCGCATCCGCATCCGCATTCGCATCCGCACGCCCACCATCCGCTGGGCAGTGCGTATACCACCGCCGAGGACGTGGTCCTCGCATCGGCCGTTGCCCATCAGCTGCATCCGGCGATGCGACCTCTGCGCGCCCTACAGCCCGAGGAC
phenotype3popS       AGCGTCTCGTCGCTGTTGACGGCGGGTAGCAACAACAACAACAGTACTAACGGTAGCCCAGCAGCAGCAGCGACGGCAGCAGCAGCAGCGGCGGCTCAGGCCTTAAGCTCACCAGATTCTGGAGcTGGCAATTATCGTAGCTCGCCGTCGCAGCTATCGCCACAAAGTAATCACAGCAATaaTAACAACAGTACTAACAACAACAACAACAACAACAATAGCAAAAATCACGAAGCTTTGAGCGCCTCACCCACAACAACAACAACAAATCGAACCACACCAACAACAACACCGCCAACACCACCGCCACAAGCAAGTGGAGCGCCAGCGCCACCACCACCACCGCCGTCGTCGTCGTCGTCATTACCCGCGCATCATTCGCCCAGCGTCGCACCGCCACCGCCACCGCCACCACAGCAGCAGCCGCAACCGCTGCATGCAGCACAGCATTTGGCGCAGCAGCAACAACAGCAATCACAGCAACCGCCACCGCCGCCATACTTTCCGGCTGCAGCATTAGCTGCTTTGGCTGGCAGTCCGGCGGGACCGCATCATCCGGGTCTTTATAGCGCCGCGGGCGGTTTGCGTTTCCCGCCGCATCCAGCGCATCCGCATCCGCATTCGCATCCGCACGCCCACCATCCGCTGGGCAGTGCGTATACCACCGCCGAGGACGTGGTCCTCGCATCGGCCGTTGCCCATCAGCTGCATCCGGCGATGCGACCTCTGCGCGCCCTACAGCCCGAGGAC
phenotype4popS       AGCGTCTCGTCGCTGTTGACGGCGGGTAGCAACAACAACAACAGTAtTAACGGTAGCgCAGCAGCAGCAGCGACGGCAGCAGCAGCAGCGGCGGCTCAGGCCTTAAGCTCACCAGATTCTGGAGCTGGCAATTATCGTAGCTCGCCGTCGCAGCTATCGCCACAAAGTAATCACAGCAATaaTAACAACAGTACTAACAACAACAACAACAACAACAATAGCAAAaATCACGAAGCTTTGAGCGTCTCACCCACAACAACAACAACAAATCGAACCACACCAACAACAACACCGCCAACACCACCGCCACAAGCAAGTGGAGCGCCAGCGCCACCACCACCACCGCCGTCGTCGTCGTCGTCATTACCCGCGCATCATTCGCCCAGCGTCGCACCGCCACCGCCACCGCCACCACAGCAGCAGCCGCAACCGCTGCATGCAGCACAGCATTTGGCGCAGCAGCAACAACAGCAAgCACAGCAACCGCCACCGCCGCCATACTTTCCGGCcGCAGCATTAGCTGCTTTGGCTGGCAGTCCGGCgGGACCGCATCATCCGGGTCTTTATAGCGCCGCGGGCGGTTTGCGTTTCCCGCCGCATCCAGgGCATCCGCATCCGCATTCGCATCCGCACGCCCACCATCCGCTGGGCAGTGCGTATACCACCGCCGAGGACGTGGTCCTCGCATCGGCCGTTGCCCATCAGCTGCATCCGGCGATGCGACCTCTGCGCGCCCTACAGCCCGAGGAC
phenotype4popS       AGCGTCTCGTCGCTGTTGACGGCGGGTAGCAACAACAACAACAGTATTAACGGTAGCGCAGCAGCAGCAGCGACGGCAGCAGCAGCAGCGGCAGCTCAGGCCTTAAGCTCACCAGATTCTGGAGCTGGCAATTATCGTAGCTCGCCGTCGCAGCTATCGCCACAAAGTAATCACAGCAATaaTAACAACAGTACTAACAACAACAACAACAACAACAATAGCAAAAATCACGAAGCTTTGAGCGTCTCACCCACAACAACAACAACAAATCGAACCACACCAACAACAACACCGCCAACACCACCGCCACAAGCAAGTGGAGCGCCAGCGCCACCACCACCACCGCCGTCGTCGTCGTCGTCATTACCCGCGCATCATTCGCCCAGCGTCGCACCGCCACCGCCACCGCCACCACAGCAGCAGCCGCAACCGCTGCATGCAGCACAGCATTTGGCGCAGCAGCAACAACAGCAAGCACAGCAACCGCCACCGCCGCCATACTTTCCGGCCGCAGCATTAGCTGCTTTGGCTGGCAGTCCGGCGGGACCGCATCATCCGGGTCTTTATAGCGCCGCGGGCGGTTTGCGTTTCCCGCCGCATCCAGGGCATCCGCATCCGCATTCGCATCCGCACGCCCACCATCCGCTGGGCAGTGCGTATACCACCGCCGAGGACGTGGTCCTCGCATCGGCCGTTGCCCATCAGCTGCATCCGGCGATGCGACCTCTGCGCGCCCTTCAGCCCGAGGAC
phenotype4popS       AGCGTCTCGTCGCTGTTGACGGCGGGTAGCAACAACAACAACAGTATTAACGGTAGCGCAGCAGCAGCAGCGACGGCAGCAGCAGCAGCGGCAGCTCAgGCCTTAAGCTCACCAGATTCTGGAGCTGGCAATTATCGTAGCTCGCCGTCGCAGCTATCGCCACAAAGTAATCACAGCAATaaTAACAACAGTACTAACAACAACAACAACAACAACAATAGCAAAAATCACGAAGCTTTGAGCGTCTCACCCACAACAACAACAACAAATCGAACCACACCAACAACAACACCGCCAACACCACCGCCACAAGCAAGTGGAGCGCCAGCGCCACCACCACCACCGCCGTCGTCGTCGTCGTCATTACCCGCGCATCATTCGCCCAGCGTCGCACCGCCACCGCCACCGCCACCACAGCAGCAGCCGCAACCGCTGCATGCAGCACAGCATTTGGCGCAGCAGCAACAACAGCAAGCACAGCAACCGCCACCGCCGCCATACTTTCCGGCCGCAGCATTAGCTGCTTTGGCTGGCAGTCCGGCGGGACCGCATCATCCGGGTCTTTATAGCGCCGCGGGCGGTTTGCGTTTCCCGCCGCATCCAGGGCATCCGCATCCGCATTCGCATCCGCACGCCCACCATCCGCTGGGCAGTGCGTATACCACCGCCGAGGACGTGGTCCTCGCATCGGCCGTTGCCCATCAGCTGCATCCGGCGATGCGACCTCTGCGCGCCcTTCAGCCCGAGGAC
phenotype4popS       AGCGTCTCGTCGCTGTTGACGGCGGGTAGCAACAACAACAACAGTATTAACGGTAGCGCAGCAGCAGCAGCGACgGCAGCAGCAGCAGCGGCAGCTCAgGCCTTAAGCTCACCAGATTCTGGAGCTGGCAATTATCGTAGCTCGCCGTCGCAGCTATCGCCACAAAGTAATCACAGCAATaaTAACAACAGTACTAACAACAACAACAACAACAACAATAGCAAAAATCACGAAGCTTTGAGCGTCTCACCCACAACAACAACAACAAATCGAACCACACCAACAACAACACCGCCAACACCACCGCCACAAGCAAGTGGAGCGCCAGCGCCACCACCACCACCGCCGTCGTCGTCGTCGTCATTACCCGCGCATCATTCGCCCAGCGTCGCACCGCCACCGCCACCGCCACCACAGCAGCAGCCGCAACCGCTGCATGCAGCACAGCATTTGGCGCAGCAGCAACAACAGCAAGCACAGCAACCGCCACCGCCGCCATACTTTCCGGCCGCAGCATTAGCTGCTTTGGCTGGCAGTCCGGCGGGACCGCATCATCCGGGTCTTTATAGCGCCGcGGgCGGTTtGCGTTTCCcGCCGCATCCagGGCATCCGCATCCGCATTCGCATCCGCACGCCCACCATCCGCTGGGCAGTGCGTATACcACCGCCGAGgACGTGGTcCTCGCATCGGCCGTTGCCCATCAGCTGCATCCGGCGATGCGACCTCTGCGCGCCCTTCAGCCCGAGGAC
phenotype4popS       AGCGTCTcGTCGCTGTTGACGGCGGGTAGCAACAACAACAACAGTATTAACGGTAGCGCAGCAGCAGCAGCGACGGCAGCAGCAGCAGCGGCAGCTCAGGCCTTAAGCTCACCAGATTCTGGAGCTGGCAATTATCGTAGCTCGCCGTCGCAGCTATCGCCACAAAGTAATCACAGCAATaaTAACAACAGTACTAACAACAACAACAACAACAACAATAGCAAAAATCACGAAGCTTTGAGCGTCTCACCCACAACAACAACAACAAATCGAACCACACCAACAACAACACCGCCAACACCACCGCCACAAGCAAGTGGAGCGCCAGCGCCACCACCACCACCGCCGTCGTCGTCGTCGTCATTACCCGCGCATCATTCGCCCAGCGTCGCACCGCCACCGCCACCGCCACCACAGCAGCAGCCGCAACCGCTGCATGCAGCACAGCATTTGGCGCAGCAGCAACAACAGCAAGCACAGCAACCGCCACCGCCGCCATACTTTCCGGCCGCAGCATTAGCTGCTTTGGCTGGCAGTCCGGCGGGACCGCATCATCCGGGTCTTTATAGCgCCGCGGGCGGTTTGCGTTTCCCGCCGCATCCAGGGCATCCGCATCCGCATTCGCATCCGCACGCCCACCATCCGCTGGGCAGTGCGTATACCACCGCCGAGGACGTGGTCCTCGCATCGGCCGTTGCCCATCAGCTGCaTCCGGCGATGCGACCTCTGCGCGCCCTTCAGCCCGAGGAC
phenotype4popS       AGCGTCTCGTCGCTGTTGACGGCGGGTAGCAACAACAACAACAGTATTAACGGTAGCGCAGCAGCAGCAGCGACGGCAGCAGCAGCAGCGGCAGCTCAgGCCTTAAGCTCACCAGATTCTGGAGCTGGCAATTATCGTAGCTCGCCGtCGCAGCTATCGCCACAAAgTAATCACAGCAATaaTAACAACAGTACTAACAACAACAACAACAACAACAATAGCAAAAATCACGAAGCTTTGAGCGTCTCACCCACAACAACAACAACAAATCGAACCACACCAACAACAACACCGCCAACACCACCGCCACAAGCAAGTGGAGCGCCAGCGCCACCACCACCACCGCCGTCGTCGTCGTCGTCATTACCCGCGCATCATTCGCCCAGCGTCGCACCGCCACCGCCACCGCCACCACAGCAGCAGCCGCAACCGCTGCATGCAGCACAGCATTTGGCGCAGCAGCAACAACAGCAAGCACAGCAACCGCCACCGCCGCCATACTTTCCGGCCGCAGCATTAGCTGCTTTGGCTGGCAGTCCGGCGGGACCGCATCATCCGGGTCTTTATAGCGCCGCGGGCGGTTTGCGTTTCCCGCCGCATCCAGGGCATCCGCATCCGCATTCGCATCCGCACGCCCACCATCCGCTGGGCAGTGCGTATACCACCGCCGAGGACGTGGTCCTCGCATCGGCCGTTGCCCATCAGCTGCATCCGGCGATGCGACCTCTGCGCGCCCTTCAGCCCGAGGAC
phenotype5popS       AGCGTCTCGTCGCTGTTGACGGCGGGTAGCAACAACAACAACAGTATTAACGGTAGCGCAGCAGcAGCAGCGACGGCAGCAGCAGCAGCGGCAGCTCAGGCCTTAAGCTCACCAGATTCTGGAGCTGGCAATTATCGTAGCTCGCCGTCGCAGCTATCGCCACAAAGTAATCACAGCAATaaTAACAACAGTACTAACAACAACAACAACAACAACAATAGCAAAAATCACGAAGCTTTGAGCGTCTCACCCACAACAACAACAACAAATCGAACCACACCAACAACAACACCGCCAACACCACCGCCACAAGCAAGTGGAGCGCCAGCGCCACCACCACCACCGCCGTCGTCGTCGTCGTCATTACCCGCGCATCATTCGCCCAGCGTCGCACCGCCACCGCCACCGCCACCACAGCAGCAGCCGCAACCGCTGCATGCAGCACAGCATTTGGCGCAGCAGCAACAACAGCAAGCACAGCAACCGCCACCGCCGCCATACTTTCCGGCCGCAGCATTAGCTGCTTTGGCTGGCAGTCCGGCGGGACCGCATCATCCGGGTCTTTATAGCGCCGCGGGCGGTTTGCGTTTCCCGCCGCATCCAGGGCATCCGCATCCGCATTCGCATCCGCACGCCCACCATCCGCTGGGCAGTGCGTATACCACCGCCGAGGACGTGGTCCTCGCATCGGCCGTTGCCCATCAGCTGCATCCGGCGATGCGACCTCTGCGCGCCCTTCAGCCCGAGGAC
phenotype5popS       AGCGTCTCGTCGCTGTTGACGGCGGGTAGCAACAACAACAACAGTATTAACGGTAGCGCAGCAGCAGCAGCGACGGCAGCAGCAGCAGCGGCAGCTCAGGCCTTAAGCTCACCAGATTCTGGAGCTGGCAATTATCGTAGCTCGCCGTCGCAGCTATCGCCACAAAgTAATCACAGCAATaaTAACAACAGTACTAACAACAACAACAACAACAACAATAGCAAAAATCACGAAGCTTTGAGCGTCTCACCCACAACAACAACAACAAATCGAACCACACCAACAACAACACCGCCAACACCACCGCCACAAGCAAGTGGAGCGCCAGCGCCACCACCACCACCGCCGTCGTCGTCGTCGTCATTACCCGCGCATCATTCGCCCAGCGTCGCACCGCCACCGCCACCGCCACCACAGCAGCAGCCGCAACCGCTGCATGCAGCACAGCATTTGGCGCAGCAGCAACAACAGCAAGCACAGCAACCGCCACCGCCGCCATACTTTCCGGCCGCAGCATTAGCTGCTTTGGCTGGCAGTCCGGCGGGACCGCATCATCCGGGTCTTTATAGCGCCGCGGGCGGTTTGCGTTTCCCGCCGCATCCAGGGCATCCGCATCCGCATTCGCATCCGCACGCCCACCATCCGCTGGGCAGTGCGTATACCACCGCCGAGGACGTGGTCCTCGCATCGGCCGTTGCCCATCAGCTGCATCCGGCGATGCGACCTCTGCGCGCCCTTCAGCCCGAGGAC
phenotype5popS       AGCGTCTCGTCGCTGTTGACGGCGGGTAGCAACAACAACAACAGTATTAACGGTAGCGCAGCAGCAGCAGCGACGGCAGCAGCAGCAGCGGCAGCTCAGGCCTTAAGCTCACCAGATTCTGGAGCTGGCAATTATCGTAGCTCGCCGTCGCAGCTATCGCCACAAAGTAATCACAGCAATaaTAACAACAGTACTAACAACAACAACAACAACAACAATAGCAAAAATCACGAAGCTTTGAGCGTCTCACCCACAACAACAACAACAAATCGAACCACACCAACAACAACACCGCCAACACCACCGCCACAAGCAAGTGGAGCGCCAGCGCCACCACCACCACCGcCGTCGTCGTCGTCGTCATTACCCGCGCATCATTCGCCCAGCGTCGCACCGCCACCGCCACCGCCACCACAGCAGCAGCCGCAACCGCTGCATGCAGCACAGCATTTGGCGCAGCAGCAACAACAGCAAGCACAGCAACCGCCACCGCCGCCATACTTTCCGGCCGCAGCATTAGCTGCTTTGGCTGGCAGTCCGGCGGGACCGCATCATCCGGGTCTTTATAGCGCCGCGGGCGGTTTGCGTTTCCCGCCGCATCCAGGGCATCCGCATCCGCATTCGCATCCGCACGCCCACCATCCGCTGGGCAGTGCGTATACCACCGCCGAGGACGTGGTCCTCGCATCGGCCGTTGCCCATCAGCTGCATCCGGCGATGCGACCTCTGCGCGCCCTTCAGCCCGAGGAC
phenotype5popS       AGCGTCTCGTCGCTGTTGACGGCGGGTAGCAACAACAACAACAGTACTAACGGTAGCCCAGCAGCAGCAGCGACGGCAGCAGCAGCAGCGGCGGCTCAGGCCTTAAGCTCACCAGATTCTGGAGCTGGCAATTATCGTAGCTCGCCGTCGCAGCTATCgccacaaagTAATCACAGCAATaaTAACAACAGTACTAACAACAACAACAACAACAACAATAGCAAAAATCACGAAGCTTTGAGCGCCTCACCCACAACAACAACAACAAATCGAACCACACCAACAACAACACCGCCAACACCACCGCCACAAGCAAGTGGAGCGCCAGCGCCACCACCACCACCGCCGTCGTCGTCGTCGTCATTACCCGCGCATCATTCGCCCAGCGTCGCACCGCCACCGCCACCGCCACCACAGCAGCAGCCGCAACCGCTGCATGCAGCACAGCATTTGGCGCAGCAGCAACAACAGCAATCACAGCAACCGCCACCGCCGCCATACTTTCCGGCTGCAGCATTAGCTGCTTTGGCTGGCAGTCCGGCGGGACCGCATCATCCGGGTCTTTATAGCGCCGCGGGCGGTTTGCGTTTCCCGCCGCATCCAGCGCATCCGCATCCGCATTCGCATCCGCACGCCCACCATCCGCTGGGCAGTGCGTATACCACCGCCGAGGACGTGGTCCTCGCATCGGCCGTTGCCCATCAGCTGCATCCGGCGATGCGACCTCTGCGCGCCCTACAGCCCGAGGAC
phenotype5popS       AGCGTCTCGTCGCTGTTGACGGCGGGTAGCAACAACAACAACAGTACTAACGGTAGCCCAGCAGCAGCAGCGACGGCAGCAGCAGCAGCGGCGGCTCAgGCCTTAAGCTCACCAGATTCTGGAGCTGGCAATTATCGTAGCTCGCCGTCGCAGCTATCGCCACAAAGTAATCACAGCAATaaTAACAACAGTACTAACAACAACAACAACAACAACAATAGCAAAAATCACGAAGCTTTGAGCGCCTCACCCACAACAACAACAACAAATCGAACCACACCAACAACAACACCGCCAACACCACCGCCACAAGCAAGTGGAGCGCCAGCGCCACCACCACCACCGCCGTCGTCGTCGTCGTCATTACCCGCGCATCATTCGCCCAGCGTCGCACCGCCACCGCCACCGCCACCACAGCAGCAGCCGCAACCGCTGCATGCAGCACAGCATTTGGCGCAGCAGCAACAACAGCAATCACAGCAACCGCCACCGCCGCCATACTTTCCGGCTGCAGCATTAGCTGCTtTGGCTGGCAGTCCGGCGGGACCGCATCATCCGGGTCTTTATAGCGCCGCGGGCGGTTTGCGTTTCCCGCCGCATCCAGCGCATCCGCATCCGCATTCGCATCCGCACGCCCACCATCCGCTGGGCAGTGCGTATACCACCGCCGAGGACGTGGTCCTCGCATCGGCCGTTGCCCATCAGCTGCATCCGGCGATGCGACCTCTGCGCGCCCTACAGCCCGAGGAC
phenotype6popS       AGCGTCtCGTCGCTGTTGACGGCGGGTAGCAACAACAACAACAGTATTAACGGTAGCGCAGCAGCAGCAGCGACGGCAGCAGCAGCAGCGGCAGCTCAGGCCTTAAGCTCACCAGATTCTGGAGCTGGCAATTATCGTAGCTCGCCGTCGCAGCTATCGCCACAAAGTAATCACAGCAATaaTAACAACAGTACTAACAACAACAACAACAACAACAATAGCAAAAATCACGAAGCTTTGAGCGTCTCACCCACAACAACAACAACAAATCGAACCACACCAACAACAACACCGCCAACACCACCGCCACAAGCAAGTGGAGCGCCAGCGCCACCACCACCACCGCCGTCGTCGTCGTCGTCATTACCCGCGCATCATTCGCCCAGCGTCGCACCGCCACCGCCACCGCCACCACAGCAGCAGCCGCAACCGCTGCATGCAGCACAGCATTTGGCGCAGCAGCAACAACAGCAAGCACAGCAACCGCCACCGCCGCCATACTTTCCGGCCGCAGCATTAGCTGCTTTGGCTGGCAGTCCGGCGGGACCGCATCATCCGGGTCTTTATAGCGCCGCGGGCGGTTTGCGTTTCCCGCCGCATCCAGGGCATCCGCATCCGCATTCGCATCCGCACGCCCACCATCCGCTGGGCAGTGCGTATACCACCGCCGAGGACGTGGTCCTCGCATCGGCCGTTGCCCATCAGCTGCATCCGGCGATGCGACcTCTGCGCGCCCTTCAGCCCGAGGAC
phenotype6popS       AGCGTCTCGTCGCTGTTGACGGCGGGTAGCAACAACAACAACAGTACTAACGGTAGCCCAGCAGCAGCAGCGACGGCAGCAGCAGCAGCGGCGGCTCAgGCCTTAAGCTCACCAGATTCTGGAGCTGGCAATTATCGTAGCTCGCCGTCGCAGCTATCGCCACAAAGTAATCACAGCAATaaTAACAACAGTACTAACAACAACAACAACAACAACAATAGCAAAAATCACGAAGCTTTGAGCGCCTCACCCACAACAACAACAACAAATCGAACCACACCAACAACAACACCGCCAACACCACCGCCACAAGCAAGTGGAGCGCCAGCGCCACCACCACCACCGCCGTCGTCGTCGTCGTCATTACCCGCGCATCATTCGCCCAGCGTCGCACCGCCACCGCCACCGCCACCACAGCAGCAGCCGCAACCGCTGCATGCAGCACAGCATTTGGCGCAGCAGCAACAACAGCAATCACAGCAACCGCCACCGCCGCCATACTTTCCGGCTGCAGCATTAGCTGCTTTGGCTGGCAGTCCGGCGGGACCGCATCATCCGGGTCTTTATAGCGCCGCGGGCGGTTTGCGTTTCCCGCCGCATCCAGCGCATCCGCATCCGCATTCGCATCCGCACGCCCACCATCCGCTGGGCAGTGCGTATACCACCGCCGAGGACGTGGTCCTCGCATCGGCCGTTGCCCATCAGCTGCATCCGGCGATGCGACCTCTGCGCGCCCTACAGCCCGAGGAC
phenotype6popS       AGCGTCTCGTCGCTGTTGACGGCGGGTAGCAACAACAACAACAGTATTAACGGTAGCGCAGCAGCAGCAGCGACGGCAGCAGCAGCAGCGGCAGCTCAgGCCTTAAGCTCACCAGATTCTGGAGCTGGCAATTATCGTAGCTCGCCGTCGCAGCTATCGCCACAAAGTAATCACAGCAATaaTAACAACAGTACTAACAACAACAACAACAACAACAATAGCAAAAATCACGAAGCTTTGAGCGTCTCACCCACAACAACAACAACAAATCGAACCACACCAACAACAACACCGCCAACACCACCGCCACAAGCAAGTGGAGCGCCAGCGCCACCACCACCACCGcCGTCGTCGTCGTCGTCATTACCCGCGCATCATTCGCCCAGCGTCGCACCGCCACCGCCACCGCCACCACAGCAGCAGCCGCAACCGCTGCATGCAGCACAGCATTTGGCGCAGCAGCAACAACAGCAAGCACAGCAACCGCCACCGCCGCCATACTTTCCGGCCGCAGCATTAGCTGCTTTGGCTGGCAGTCCGGCGGGACCGCATCATCCGGGTCTTTATAGCGCCGCGGGCGGtTTGCGTTTCCCGCCGCATCCAgGGCATCCGCATCCGCATTCGCATCCGCACGCCCACCATCCGCTGGGCAGTGCGTATACCACCGCCGAGGACGTGGTCCTCGCATCGGCCGTTGCCCATCAGCTGCATCCGGCGATGCGACCTCTGCGCGCCCTTCAGCCCGAGGAC
phenotype6popS       AGCGTCTCGTCGCTGTTGACGGCGGGTAGCAACAACAACAACAGTATTAACGGTAGCGCAGCAGCAGCAGCGACGGCAGCAGCAGCAGCGGCAGCTCAGGCCTTAAGCTCACCAGATTCTGGAGCTGGCAATTATCGtAGCTCGCCGTCGCAGCTATCGCCACAAAGTAATCACAGCAATaaTAACAACAGTACTAACAACAACAACAACAACAACAATAGCAAAAATCACGAAGCTTTGAGCGTCTCACCCACAACAACAACAACAAATCGAACCACACCAACAACAACACCGCCAACACCACCGCCACAAGCAAGTGGAGCGCCAGCGCCACCACCACCACCGcCGTCGTCGTCGTCGTCATTACCCGCGCATCATTCGCCCAGCGTCGCACCGCCACCGCCACCGCcACCACAGCAGCAGCcGCAACCGCTGCATGCAGCACAGCATTTGGCGCAGCAGCAACAACAGCAAGCACAGCAACCGCCACCGCCGCCATACTTTCCGGCCGCAGCATTAGCTGCTTTGGCTGGCAGTCCGGCGGGACCGCATCATCCGGGTCTTTATAGCGCCGCGGGCGGTTTGCGTTTCCCGCCGCATCCAGGGCATCCGCATCCGCATTCGCATCCGCACGCCCACCATCCGCTGGGCAGTGCGTATACCACCGCCGAGGACGTGGTCCTCGCATCGGCCGTTGCCCATCAGCTGCATCCGGCGATGCGACCTCTGCGCGCCCTTCAGCCCGAGGAC
phenotype6popS       AGCGTCTCGTCGCTGTTGACGGCGGGTAGCAACAACAACAACAGTATTAACGGTAGCGCAGCAGCAGCAGCGACGGCAGCAGCAGCAGCGGCAGCTCAgGCCTTAAGCTCACCAGATTCTGGAGCTGGCAATTATCGTAGCTCGCCGTCGCAGCTATCGCCACAAAGTAATCACAGCAATaaTAACAACAGTACTAACAACAACAACAACAACAACAATAGCAAAAATCACGAAGCTTTGAGCGTCTCACCCACAACAACAACAACAAATCGAACCACACCAACAACAACACCGCCAACACCACCGCCACAAGCAAGTGGAGCGCCAGCGCCACCACCACCACCGCCGTCGTCGTCGTCGTCATTACCCGCGCATCATTCGCCCAGCGTCGCACCGCCACCGCCACCGCCACCACAGCAGCAGCCGCAACCGCTGCATGCAGCACAGCATTTGGCGCAGCAGCAACAACAGCAAGCACAGCAACCGCCACCGCCGCCATACTTTCCGGCCGCAGCATTAGCTGCTTTGGCTGGCAGTCCGGCGGGACCGCATCATCCGGGTCTTTATAGCGCCGCGGGCGGTTTGCGTTTCCCGCCGCATCCAGGGCATCCGCATCCGCATTCGCATCCGCACGCCCACCATCCGCTGGGCAGTGCGTATACCACCGCCGAGGACGTGGTCCTCGCATCGGCCGTTGCCCATCAGCTGCATCCGGCGATGCGACCTCTGCGCGCCCTTCAGCCCGAGGAC
phenotype7popS       AGCGTCTCGTCGCTGTTGACGGCGGGTAGCAACAACAACAACAGTACTAACGGTAGCCCAGCAGCAGCAGCGACGGCAGCAGCAGCAGCGGCGGCTCAGGCCTTAAGCTCACCAGATTCTGGAGCTGGCAATTATCGTAGCTCGCCGTCGCAGCTATCGCCACAAAGTAATCACAGCAATaaTAACAACAGTACTAACAACAACAACAACAACAACAATAGCAAAAATCACGAAGCTTTGAGCGCCTCACCCACAACAACAACAACAAATCGAACCACACCAACAACAACACCGCCAACACCACCGCCACAAGCAAGTGGAGCGCCAGCGCCACCACCGCCACCGCCGTCGTCGTCGTCGTCATTACCCGCGCATCATTCGCCCAGCGTCGCACCGCCACCGCCACCGCCACCACAGCAGCAGCCGCAACCGCTGCATGCAGCACAGCATTTGGCGCAGCAGCAACAACAGCAATCACAGCAACCGCCACCGCCGCCATACTTTCCGGCTGCAGCATTAGCTGCTTTGGCTGGCAGTCCGGCGGGACCGCATCATCCGGGTCTTTATAGCGCCGCGGGCGGTTTGCGTTTCCCGCCGCATCCAGCGCATCCGCATCCGCATTCGCATCCGCACGCCCACCATCCGCTGGGCAGTGCGTATACCACCGCCGAGGACGTGGTCCTCGCATCGGCCGTTGCCCATCAGCTGCATCCGGCGATGCGACCTCTGCGCGCCCTACAGCCCGAGGAC
phenotype7popS       AGCGTCTCGTCGCTGTTGACGGCGGGTAGCAACAACAACAACAGTATTAACGGTAGCGCAGCAGCAGCAGCGACGGCAGCAGCAGCAGCGGCAGCTCAGGCCTTAAGCTCACCAGATTCTGGAGCTGGCAATTATCGTAGCTCGCCGTCGCAGCTATCGCCACAAAGTAATCACAGCAATaaTAACAACAGTACTAACAACAACAACAACAACAACAATAGCAAAAATCACGAAGCTTTGAGCGTCTCACCCACAACAACAACAACAAATCGAACCACACCAACAACAACACCGCCAACACCACCGCCACAAGCAAGTGGAGCGCCAGCGCCACCACCACCACCGCCGTCGTCGTCGTCGTCATTACCCGCGCATCATTCGCCCAGCGTCGCACCGCCACCGCCACCGCCACCACAGCAGCAGCCGCAACCGCTGCATGCAGCACAGCATTTGGCGCAACAGCAACAACAGCAAGCACAGCAACCGCCACCGCCGCCATACTTTCCGGCTGCAGCATTAGCTGCTTTGGCTGGCAGTCCGGCGGGACCGCATCATCCGGGTCTTTATAGCGCCGCGGGCGGTTTGCGTTTCCCGCCGCATCCAGGGCATCCGCATCCGCATTCGCATCCGCACGCCCACCATCCGCTGGGCAGTGCGTATACCACCGCCGAGGACGTGGTCCTCGCATCGGCCGTTGCCCATCAGCTGCATCCGGCGATGCGACCTCTGCGCGCCCTTCAGCCCGAGGAC
phenotype7popS       AGCGTCTCGTCGCTGTTGACGGCGGGTAGCAACAACAACAACAGTACTAACGGTAGCCCAGCAGCAGCAGCGACGGCAGCAGCAGCAGCGGCGGCTCAGGCCTTAAGCTCACCAGATTCTGGAGCTGGCAATTATCGTAGCTCGCCGTCGCAGCTATCGCCACAAAgTAATCACAGCAATaaTAACAACAGTACTAACAACAACAACAACAACAACAATAGCAAAAATCACGAAGCTTTGAGCGCCTCACCCACAACAACAACAACAAATCGAACCACACCAACAACAACACCGCCAACACCACCGCCACAAGCAAGTGGAGCGCCAGCGCCACCACCACCACCGCCGTCGTCGTCGTCGTCATTACCCGCGCATCATTCGCCCAGCGTCGCACCGCCACCGCCACCGCCACCACAGCAGCAGCCGCAACCGCTGCATGCAGCACAGCATTTGGCGCAGCAGCAACAACAGCAATCACAGCAACCGCCACCGCCGCCATACTTTCCGGCTGCAGCATTAGCTGCTTTGGCTGGCAGTCCGGCGGGACCGCATCATCCGGGTCTTTATAGCGCCGCGGGCGGTTTGCGTTTCCCGCCGCATCCAGCGCATCCGCATCCGCATTCGCATCCGCACGCCCACCATCCGCTGGGCAGTGCGTATACCACCGCCGAGGACGTGGTCCTCGCATCGGCCGTTGCCCATCAGCTGCATCCGGCGATGCGACCTCTGCGCGCCCTACAGCCCGAGGAC
phenotype7popS       AGCGTCTCGTCGCTGTTGACGGCGGGTAGCAACAACAACAACAGTATTAACGGTAGCGCAGCAGCAGCAGCGACGGCAGCAGCAGCAGCGGCAGCTCAgGCCTTAAGCTCACCAGATTCTGGAGCTGGCAATTATCGTAGCTCGCCGTCGCAGCTATCGCCACAAAgTAATCACAGCAATaaTAACAACAGTACTAACAACAACAACAACAACAACAATAGCAAAAATCACGAAGCTTTGAGCGTCTCACCCACAACAACAACAACAAATCGAACCACACCAACAACAACACCGCCAACACCACCGCCACAAGCAAGTGGAGCGCCAGCgCCACCACCACCACCGCCGTCGTCGTCGTCGTCATTACCCGCGCATCATTCGCCCAGCGTCGCACCGCCACCGCCACCGCCACCACAGCAGCAGCCGCAACCGCTGCATGCAGCACAGCATTTGGCGCAGCAGCAACAACAGCAAGCACAGCAACCGCCACCGCCGCCATACTTTCCGGCCGCAGCATTAGCTGCTTTGGCTGGCAGTCCGGCGGGACCGCATCATCCGGGTCTTTATAGCGCCGCGGGCGGTTTGCGTTTCCCGCCGCATCCAGGGCATCCGCATCCGCATTCGCATCCGCACGCCCACCATCCGCTGGGCAGTGCGTATACCACCGCCGaGGACGTGGTCCTCGCATCGGCCGTTGCCCATCAGCTGCATCCGGCGATGCGACCTCTGCGCGCCCTTCAGCCCGAGGAC
phenotype7popS       AGCGTCTCGTCGCTGTTGACGGCGGGTAGCAACAACAACAACAGTACTAACGGTAGCCCAGCAGCAGCAGCGACGGCAGCAGCAGCAGCGGCGGCTCAGGCCTTAAGCTCACCAGATTCTGGAGCTGGCAATTATCGTAGCTCGCCGTCGCAGCTATCGCCACAAAgTAATCACAGCAATaaTAACAACAGTACTAACAACAACAACAACAACAACAATAGCAAAAATCACGAAGCTTTGAGCGCCTCACCCACAACAACAACAACAAATCGAACCACACCAACAACGACACCGCCAACACCACCGCCACAAGCAAGTGGAGCGCCAGCGCCACCACCACCACCGCCGTCGTCGTCGTCGTCATTACCCGCGCATCATTCGCCCAGCGTCGCACCGCCACCGCCACCGCCACCACAGCAGCAGCCGCAACCGCTGCATGCAGCACAGCATTTGGCGCAGCAGCAACAACAGCAATCACAGCAACCGCCACCGCCGCCATACTTTCCGGCTGCAGCATTAGCTGCTTTGGCTGGCAGTCCGGCGGGACCGCATCATCCGGGTCTTTATAGCGCCGCGGGCGGTTTGCGTTTCCCGCCGCATCCAGCGCATCCGCATCCGCATTCGCATCCGCACGCCCACCATCCGCTGGGCAGTGCGTATACCACCGCCGAGgACGTGGTCCTCGCATCGGCCGTTGCCCATCAGCTGCATCCGGCGATGCGACCTCTGCGCGCCCTACAGCCCGAGGAC
phenotype7popS       AGCGTCTCGTCGCTGTTGACGGCGGGTAGCAACAACAACAACAGTATTAACGGTAGCGCAGCAGCAGCAGCGACGGCAGCAGCAGCAGCGGCAGCTCAGGCCTTAAGCTCACCAGATTCTGGAGCTGGCAATTATCGTAGCTCGCCGTCGCAGCTATCGCCACAAAGTAaTCACAGCAATaaTAACAACAGTACTAACAACAACAACAACAACAACAATAGCAAAAATCACGAAGCTTTGAGCGTCTCACCCACAACAACAACAACAAATCGAACCACACCAACAACAACACCGCCAACACCACCGCCACAAGCAAGTGGAGCGCCAGCGCCACCACCACCACCGCCGTCGTCGTCGTCGTCATTACCCGCGCATCATTCGCCCAGCGTCGCACCGCCACCGCCACCGCCACCACAGCAGCAGCCGCAACCGCTGCATGCAGCACAGCATTTGGCGCAGCAGCAACAACAGCAAGCACAGCAACCGCCACCGCCGCCATACTTTCCGGCCGCAGCATTAGCTGCTTTGGCTGGCAGTCCGGCGGGACCGCATCATCCGGGTCTTTATAGCGCCGCGGGCGGTTTGCGTTTCCCGCCGCATCCAGGgCATCCGCATCCGCATTCGCATCCGCACGCCCACCATCCGCTGGGCAGTGCGTATACCACCGCCGAgGACGTGGTCCTCGCATcGGCCGTTGCCCATCAGCTGCATCCGGCGATGCGACCTCTGCGCGCCCTTCAGCCCGAGGAC
phenotype7popS       AGCGTCTCGTCGCTGTTGACGGCGGGTAGCAACAACAACAACAGTATTAACGGTAGCGCAGCAGCAGCAGCGACGGCAGCAGCAGCAGCGGCAGCTCAgGCCTTAAGCTCACCAGATTCTGGAGCTGGCAATtATCGTAGCTCGCCGTCGCAGCTATCGCCACAAAGTAATCACAGCAATaaTAACAACAGTACTAACAACAACAACAACAACAACAATAGCAAAAATCACGAAGCTTTGAGCGTCTCACCCACAACAACAACAACAAATCGAACCACACCAACAACAACACCGCCAACACCACCGCCACAAGCAAGTGGAGCGCCAGCGCCACCACCACCACCGCCGTCGTCGTCGTCGTCATTACCCGCGCATCATTCGCCCAGCGTCGCACCGCCACCGCCACCGCCACCACAGCAGCAGCCGCAACCGCTGCATGCAGCACAGCATTTGGCGCAGCAGCAACAACAGCAAGCACAGCAACCGCCACCGCCGCCATACTTTCCGGCCGCAGCATTAGCTGCTTTGGCTGGCAGTCCGGCGGGACCGCATCATCCGGGTCTTTATAGCGCCGCGGGCGGTTTGCGTTTCCcGCCGCATCCAGGgcATCCGCATCCGCATTCGCATCCGCACGCCCACCATCCGCTGGGCAGTGCGTATACCACCGCCGAGgACGTGGTCCTCGCATCGGCCGTtGCCCATCAGCTGCATCCGGCGATGCGACCTCTGCGCGCCCTTCAGCCCGAGGAC
phenotype7popS       AGCGTCTCGTCGCTGTTGACGGCGGGTAGCAACAACAACAACAGTATTAACGGTAGCGCAGCAGCAGCAGCGACGGCAGCAGCAGCAGCGGCAGCTCAGGCCTTAAGCTCACCAGATTCTGGAGCTGGCAATTATCGTAGCTCGCCGTCGCAGCTATcGCCACaAAGTAATCACAGCAATaaTAACAACAGTACTAACAACAACAACAACAACAACAATAGCAAAAATCACGAAGCTTTGAGCGTCTCACCCACAACAACAACAACAAATCGAACCACACCAACAACAACACCGCCAACACCACCGCCACAAGCAAGTGGAGCGCCAGCGCCACCACCACCACCGCCGTCGTCGTCGTCGTCATTACCCGCGCATCATTCGCCCAGCGTCGCACCGCCACCGCCACCGCCACCACAGCAGCAGCCGCAGCCGCTGCATGCAGCACAGCATTTGGCGCAGCAGCAACAACAGCAAGCACAGCAACCGCCACCGCCGCCATACTTTCCGGCCGCAGCATTAGCTGCTTTGGCTGGCAGTCCGGCGGGACCGCATCATCCGGGTCTTTATAGCGCCGCGGGCGGTTTGCGTTTCCCGCCGCATCCAGGGCATCCGCATCCGCATTCGCATCCGCACGCCCACCATCCGCTGGGCAGTGCGTATACCACCGCCGAGGACGTGGTCCTCGCATCGGCCGTTGCCCATCAGCTGCATCCGGCGATGCGACCTCTGCGCGCCCTTCAGCCCGAGGAC
phenotype7popS       AGCGTCTCGTCGCTGTTGACGGCGGGTAGCAACAACAACAACAGTATTAACGGTAGCGCAGCAGCAGCAGCGACGGCAGCAGCAGCAGCGGCAGCTCAGGCCTTAAGCTCACCAGATTCTGGAGCTGGCAATTATCGAAGCTCGCCGTCGCAGCTATCGCCACAAAGTAATCACAGCAATaaTAACAACAGTACTAACAACAACAACAACAACAACAATAGCAAAAATCACGAAGCTTTGAGCGTCTCACCCACAACAACAACAACAAATCGAACCACACCAACAACAACACCGCCAACACCACCGCCACAAGCAAGTGGAGCGCCAGCGCCACCACCACCACCGCCGTCGTCGTCGTCGTCATTACCCGCGCATCATTCGCCCAGCGTCGCACCGCCACCGCCACCGCCACCACAGCAGCAGCCGCAACCGCTGCATGCAGCACAGCATTTGGCGCAGCAGCAACAACAGCAAGCACAGCAACCGCCACCGCCGCCATACTTTCCGGCCGCAGCATTAGCTGCTTTGGCTGGCAGTCCGGCGGGACCGCATCATCCGGGTCTTTATAGCGCCGCGGGCGGTTTGCGTTTCCCGCCGCATCCAGGGCATCCGCATCCGCATTCGCATCCGCACGCCCACCATCCGCTGGGCAGTGCGTATACCACCGCCGAGGACGTGGTCCTCGCATCGGCCGTTGCCCaTCAGCTGCATCCGGCGATGCGACCTCTGCGCGCCCTTCAGCCCGAGGAC
phenotype8popS       AGCGTCTCGTCGCTGTTGACGGCGGGTAGCAACAACAACAACAGTACTAACGGTAGCCCAGCAGCAGCAGCGACGGCAGCAGCAGCAGCGGCGGCTCAGGCCTTAAGCTCACCAGATTCTGGAGCTGGCAATTATCGTAGCTCGCCGTCGCAGCTATCGCCACAAAgTAATCACAGCAATaaTAACAACAGTACTAACAACAACAACAACAACAACAATAGCAAAAATCACGAAGCTTTGAGCGCCTCACCCACAACAACAACAACAAATCGAACCACACCAACAACAACACCGCCAACACCACCGCCACAAGCAAGTGGAGCGCCAGCGCCACCACCACCACCGCCGTCGTCGTCGTCGTCATTACCCGCGCATCATTCGCCCAGCGTCGCACCGCCACCGCCACCGCCACCACAGCAGCAGCCGCAACCGCTGCATGCAGCACAGCATTTGGCGCAGCAGCAACAACAGCAATCACAGCAACCGCCACCGCCGCCATACTTTCCGGCTGCAGCATTAGCTGCTTTGGCTGGCAGTCCGGCGGGACCGCATCATCCGGGTCTTTATAGCGCCGCGGGCGGTTTGCGTTTCCCGCCGCATCCAGCGCATCCGCATCCGCATTCGCATCCGCACGCCCACCATCCGCTGGGCAGTGCGTATACCACCGCCGAGGACGTGGTCCTCGCAtCGGCCGTTGCCCATCAGCTGCATCCGGCGATGCGACCTCTGCGCGCCCTACAGCCCGAGGAC
phenotype8popS       AGCGTCTCGTCGCTGTTGACGGCGGGTAGCAACAACAAcaacAGTATTAACGGTAGCGCAGCAGCAGCAGCGACGGCAGCAGCAGCAGCGGCAGCTCAGGCCTTAAGCTCACCAGATTCTGGAGCTGGCAATTATCGTAGCTCGCCGTCGCAGCTATCGCCACAAAGTAATCACAGCAATaaTAACAACAGTACTAACAACAACAACAACAACAACAATAGCAAAAATCACGAAGCTTTGAGCGTCTCACCCACAACAACAACAACAAATCGAACCACACCAACAACAACACCGCCAACACCACCGCCACAAGCAAGTGGAGCGCCAGCGCCACCACCACCACCGCCGTCGTCGTCGTCGTCATTACCCGCGCATCATTCGCCCAGCGTCGCACCGCCACCGCCACCGCCACCACAGCAGCAGCCGCAACCGCTGCATGCAGCACAGCATTTGGCGCAGCAGCAACAACAGCAAGCACAGCAACCGCCACCGCCGCCATACTTTCCGGCCGCAGCATTAGCTGCTTTGGCTGGCAGTCCGGCGGGACCGCATCATCCGGGTCTTTATAGCGCCGCGGGCGGTTTGCGTTTCCCGCCGCATCCAGGGCATCCGCATCCGCATTCGCATCCGCACGCCCACCATCCGCTGGGCAGTGCGTATACCACCGCCGAGGACGTGGTCCTCGCATCGGCCGTTGCCCATcAGCTGCATCCGGCGATGCGACCTCTGCGCGCCCTTCAGCCCGAGGAC
phenotype8popS       AGCGTCTCGTCGCTGTTGACGGCGGGTAGCAACAACAACAACAGTACTAACGGTAGCCCAGCAGCAGCAGCGACGGCAGCAGCAGCAGCGGCGGCTCAGGCCTTAAGCTCACCAGATTCTGGAGCTGGCAATTATCGTAGCTCGCCGTCGCAgCTATCGCCACAAAGTAATCACAGCAATaaTAACAACAGTACTAACAACAACAACAACAACAACAATAGCAAAAATCACGAAGCTTTGAGCGCCTCACCCACAACAACAACAACAAATCGAACCACACCAACAACAACACCGCCAACACCACCGCCACAAGCAAGTGGAGCGCCaGCGCCACCACCACCACCGCCGTCGTCGTCGTCGTCATTACCCGCGCATCATTCGCCCAGCGTCGCACCGCCACCGCCACCGCCACCACAGCAGCAGCCGCAACCGCTGCATGCAGCACAGCATTTGGCGCAGCAGCAACAACAGCAATCACAGCAACCGCCACCGCCGCCATACTTTCCGGCTGCAGCATTAGCTGCTTTGGCTGGCAGTCCGGCGGGACCGCATCATCCGGGTCTTTATAGCGCCGCGGGCGGTTTGCGTTTCCCGCCGCATCCAGCGCATCCGCATCCGCATTCGCATCCGCACGCCCACCATCCGCTGGGCAGTGCGTATACCACCGCCGAGGACGTGGTCCTCGCATCGGCCGTTGCCCATCAGCTGCATCCGGCGATGCGACCTCTGCGCGCCCTACAGCCCGAGGAC
phenotype9popS       AGCGTCTCGTCGCTGTTGACGGCGGGTAGCAACAACAACAACAGTACTAACGGTAGCCCAGCAGCAGCAGCGACGGCAGCAGCAGCAGCGGCGGCTCAGGCCTTAAGCTCACCAGATTCTGGAGCTGGCAATTATCGTAGCTCGCCGTCGCAGCTATCGCCACAAAGTAATCACAGCAATaaTAACAACAGTACTAACAACAACAACAACAACAACAATAGCAAAAATCACGAAGCTTTGAGCGCCTCACCCACAACAAcAACAACAAATCGAACCACACCAACAACAACACCGCCAACACCACCGCCACAAGCAAGTGGAGCGCCAGCGCCACCACCACCACCGCCGTCGTCGTCGTCGTCATTACCCGCGCATCATTCGCCCAGCGTCGCACCGCCACCGCCACCGCCACCACAGCAGCAGCCGCAACCGCTGCATGCAGCACAGCATTTGGCGCAGCAGCAACAACAGCAATCACAGCAACCGCCACCGCCGCCATACTTTCCGGCTGCAGCATTAGCTGCTTTGGCTGGCAGTCCGGCGGGACCGCATCATCCGGGTCTTTATAGCGCCGCGGGCGGTTTGCGTTTCCCGCCGCATCCAGCGCATCCGCATCCGCATTCGCATCCGCACGCCCACCATCCGCTGGGCAGTGCGTATACCACCGCCGAGGACGTGGTCCTCGCATCGGCCGTTGCCCATCAGCTGCATCCGGCGATGCGACCTCTGCGCGCCCTACAGCCCGAGGAC
phenotype9popS       AGCGTCTCGTCGCTGTTGACGGCGGGTAGCAACAACAACAACAGTACTAACGGTAGCCCAGCAGCAGCAGCGACGGCAGCAGCAGCAGCGGCGGCTCAGGCCTTAAGCTCACCAGATTCTGGAGCTGGCAATTATCGTAGCTCGCCGTCGCAGCTATCGCCACAAAGTAATCACAGCAATaaTAACAACAGTACTAACAACAACAACAACAACAACAATAGCAAAAATCACGAAGCTTTGAGCGCCTCACCCACAACAACAACAACAAATCGAACCACACCAACAACAACACCGCCAACACCACCGCCACAAGCAAGTGGAGCGCCAGCGCCaCCACCACCACCGCCGTCGTCGTCGTCGTCATTACCCGCGCATCATTCGCCCAGCGTCGCACCGCCACCGCCACCGCCACCACAGCAGCAGCCGCAACCGCTGCATGCAGCACAGCATTTGGCGCAGCAGCAACAACAGCAATCACAGCAACCGCCACCGCCGCCATACTTTCCGGCTGCAGCATTAGCTGCTTTGGCTGGCAGTCCGGCGGGACCGCATCATCCGGGTCTTTATAGCGCCGCGGGCGGTTTGCGTTTCCCGCCGCATCCAGCGCATCCGCATCCGCATTCGCATCCGCACGCCCACCATCCGCTGGGCAGTGCGTATACCACCGCCGAGGACGTGGTCCTCGCATCGGCCGTTGCCCATCAGCTGCATCCGGCGATGCGACCTCTGCGCGCCCTACAGCCCGAGGAC
phenotype9popS       AGCGTCTCGTCGCTGTTGACGGCGGGTAGCAACAACAACAACAGTATTAACGGTAGCGCAGCAGCAGCAGCGACGGCAGCAGCAGCAGCGGCAGCTCAGGCCTTAAGCTCACCAGATTCTGGAGCTGGCAATTATCGTAGCTCGCCGTCGCAGCTATCGCCACAAAgTAATCACAGCAATaaTAACAACAGTACTAACAACAACAACAACAACAACAATAGCAAAAATCACGAAGCTTTGAGCGTCTCACCCACAACAACAACAaCAAATCGAACCACACCAACAACAACACCGCCAACACCACCGCCACAAGCAAGTGGAGCGCCAGCGCCACCACCACCACCGCCGTCGTCGTCGTCGTCATTACCCGCGCATCATTCGCCCAGCGTCGCACCGCCACCGCCACCGCCACCACAGCAGCAGCCGCAACCGCTGCATGCAGCACAGCATTTGGCGCAGCAGCAACAACAGCAAGCACAGCAACCGCCACCGCCGCCATACTTTCCGGCCGCAGCATTAGCTGCTTTGGCTGGCAGTCCGGCGGGACCGCATCATCCGGGTCTTTATAGCGCCGCGGGCGGTTTGCGTTTCCCGCCGCATCCAGGGCATCCGCATCCGCATTCGCATCCGCACGCCCACCATCCGCTGGGCAGTGCGTATACCACCGCCGAGGACGTGGTCCTCGCATCGGCCGTTGCCCATCAGCTGCATCCGGCGATGCGACCTCTGCGCGCCCTTCAGCCCGAGGAC
phenotype9popS       AGCGTCTCGTCGCTGTTGACGGCGGGTAGCAACAACAACAACAGTACTAACGGTAGCCCAGCAGCAGCAGCGACGGCAGCAGCAGCAGCGGCGGCTCAGGCCTTAAGCTCACCAGATTCTGGAGCTGGCAATTATCGTAGCTCGCCGTCGCAGCTATCGCCACAAAGTAATCACAGCAATaaTAACAACAGTACTAACAACAACAACAACAACAACAATAGCAAAAATCACGAAGCTTTGAGCGCCTCACCCACAACAACAACAACAAATCGAACCACACCAACAACAACACCGCCAACACCACCGCCACAAGCAAGTGGAGCGCCAGCGCCACCACCACCACCGCCGTCGTCGTCGTCGTCATTACCCGCGCATCATTCGCCCAGCGTCGCACCGCCACCGCCACCGCCACCACAGCAGCAGCCGCAACCGCTGCATGCAGCACAGCATTTGGCGCAGCAGCAACAACAGCAATCACAGCAACCGCCACCGCCGCCATACTTTCCGGCTGCAGCATTAGCTGCTTTGGCTGGCAGTCCGGCGGGACCGCATCATCCGGGTCTTTATAGCGCCGCGGGCGGTTTGCGTTTCCCGCCGCATCCAGCGCATCCGCATCCGCATTCGCATCCGCACGCCCACCATCCGCTGGGCAGTGCGTATACCACCGCCGAGGACGTGGTCCTCGCATCGGCCGTTGCCCATCAGCTGCATCCGGCGATGCGACCTCTGCGCGCCCTACAGCCCGAGGAC
phenotype9popS       AGCGTCTCGTCGCTGTTGACGGCGGGTAGCAACAACAACAACAGTACTAACGGTAGCCCAGCAGCAGCAGCGACGGCAGCAGCAGCAGCGGCGGCTCAGGCCTTAAGCTCACCAGATTCTGGAGCTGGCAATTATCGTAGCTCGCCGTCGCAGCTATCgCCACAAAGTAATCACAGCAATaaTAACAACAGTACTAACAACAACAACAACAACAACAATAGCAAAAATCACGAAGCTTTGAGCGCCTCACCCACAACAACAACAACAAATCGAACCACACCAACAACAACACCGCCAACACCACCGCCACAAGCAAGTGGAGCGCCAGCGCCACCACCACCACCGCCGTCGTCGTCGTCGTCATTACCCGCGCATCATTCGCCCAGCGTCGCACCGCCACCGCCACCGCCACCACAGCAGCAGCCGCAACCGCTGCATGCAGCACAGCATTTGGCGCAGCAGCAACAACAGCAATCACAGCAACCGCCACCGCCGCCATACTTTCCGGCTGCAGCATTAGCTGCTTTGGCTGGCAGTCCGGCGGGACCGCATCATCCGGGTCTTTATAGCGCCGCGGGCGGTTTGCGTTTCCCGCCGCATCCAGCGCATCCGCATCCGCATTCGCATCCGCACGCCCACCATCCGCTGGGCAGTGCGTATACCACCGCCGAGGACGTGGTCCTCGCATCGGCCGTTGCCCATCAGCTGCATCCGGCGATGCGACCTCTGCGCGCCCTACAGCCCGAGGAC
phenotype7pop116     AGCGTCTCGTCGCTGTTGACGGCGGGTAGCAACAACAACaACAGTATTAACGGTAGCGCAGCAGCAGCAGCGACGGCAGCAGCAGCAGCGGCAGCTCAGGCCTTAAGCTCACCAGATTCTGGAGCTGGCAATTATCGTAGCTCGCCGTCGCAGCTATCGCCACAAAGTAATCACAGCAATaaTAACAACAGTACTAACAACAACAACAACAACAACAATAGCAAAAATCACGAAGCTTTGAGCGTCTCACCCACAACAACAACAACAAATCGAACCACACCAACAACAACACCGCCAACACCACCGCCACAAGCAAGTGGAGCGCCAGCGCCACCACCACCACCGCCGTCGTCGTCGTCGTCATTACCCGCGCATCATTCGCCCAGCGTCGCACCGCCACCGCCACCGCCACCGCAGCAGCAGCCGCAACCGCTGCATGCAGCACAGCATTTGGCGCAGCAGCAACAACAGCAAGCACAGCAACCGCCACCGCCGCCATACTTTCCGGCCGCAGCATTAGCTGCTTTGGCTGGCAGTCCGGCGGGACCGCATCATCCGGGTCTTTATAGCGCCGCGGGCGGTTTGCGTTTCCCGCCGCATCCAGGGCATCCGCATCCGCATTCGCATCCGCACGCCCACCATCCGCTGGGCAGTGCGTATACCACCGCCGAGGACGTGGTCCTCGCATCGGCCGTTGCCCATCAGCTGCATCCGGCGATGCGACCTCTGCGCGCCCTTCAGCCCGAGGAC
phenotype8pop116     AGCGTCTCGTCGCTGTTGACGGCGGGTAGCAACAACAACAACAGTATTAACGGTAGCGCAGCAGCAGCAGCGACGGCAGCAGCAGCAGCGGCAGCTCAGGCCTTAAGCTCACCAGATTCTGGAGCTGGCAATTATCGTAGCTCGCCGTCGCAGCTATCGCCACAAAGTAATCACAGCAATaaTAACAACAGTACTAACAACAACAACAACAACAACAATAGCAAAAATCACGAAGCTTTGAGCGTCTCACCCACAACAACAACAACAAATCGAACCACACCAACAACAACACCGCCAACACCACCGCCACAAGCAAGTGGAGCGCCAGCGCCACCACCACCACCGCCGTCGTCGTCGTCGTCATTACCCGCGCATCATTCGCCCAGCGTCGCACCGCCACCGCCACCGCCACCACAGCAGCAGCCGCAACCGCTGCATGCAGCACAGCATTTGGCGCAGCAGCAACAACAGCAAGCACAGCAACCGCCACCGCCGCCATACTTTCCGGCCGCAGCATTAGCTGCTTTGGCTGGCAGTCCGGCGGGACCGCATCATCCGGGTCTTTATAGCGCCGCGGGCGGTTTGCGTTTCCCGCCGCATCCAGGGCATCCGCATCCGCATTCGCATCCGCACGCCCACCATCCGCTGGGCAGTGCGTATACCACCGCCGAGGACGTGGTCCTCGCATCGGCCGTTGCCCATCAGCTGCATCCGGCGATGCGACCTCTGCGCGCCCTTCAGCCCGAGGAC
phenotype9pop116     AGCGTCTCGTCGCTGTTGACGGCGGGTAGCAACAACAACAACAGTATTAACGGTAGCGCAGCAGCAGCAGCGACGGCAGCAGCAGCAGCGGCAGCTCAGGCCTTAAGCTCACCAGATTCTGGAGCTGGCAATTATCGTAGCTCGCCGTCGCAGCTATCGCCACAAAGTAATCACAGCAATaaTAACAACAGTACTAACAACAACAACAACAACAACAATAGCAAAAATCACGAAGCTTTGAGCGTCTCACCCACAACAACAACAACAAATCGAACCACACCAACAACAACACCGCCAACACCACCGCCACAAGCAAGTGGAGCGCCAGCGCCACCACCACCACCGCCGTCGTCGTCGTCGTCATTACCCGCGCATCATTCGCCCAGCGTCGCACCGCCACCGCCACCGCCACCACAGCAGCAGCCGCAACCGCTGCATGCAGCACAGCATTTGGCGCAGCAGCAACAACAGCAAGCACAGCAACCGCCACCGCCGCCATACTTTCCGGCCGCAGCATTAGCTGCTTTGGCTGGCAGTCCGGCGGGACCGCATCATCCGGGTCTTTATAGCGCCGCGGGCGGTTTGCGTTTCCCGCCGCATCCAGGGCATCCGCATCCGCATTCGCATCCGCACGCCCACCATCCGCTGGGCAGTGCGTATACCACCGCCGAGGACGTGGTCCTCGCATCGGCCGTTGCCCATCAGCTGCATCCGGCGATGCGACCTCTGCGCGCCCTTCAGCCCGAGGAC
phenotype8pop119     AGCGTCTCGTCGCTGTTGACGGCGGGTAGCAACAACAACAACAGTATTAACGGTAGCGCAGCAGCAGCAGCGACGGCAGCAGCAGCAGCGGCAGCTCAGGCCTTAAGCTCACCAGATTCTGGAGCTGGCAATTATCGTAGCTCGCCGTCGCAGCTATCGCCACAAAGTAATCACAGCAATaaTAACAACAGTACTAACAACAACAACAACAACAACAATAGCAAAAATCACGAAGCTTTGAGCGTCTCACCCACAACAACAACAACAAATCGAACCACACCAACAACAACACCgccAACACCACCGCCACAAGCAAGTGGAGCGCCAGCGCCACCACCACCACCGCCGTCGTCGTCGTCGTCATTACCCGCGCATCATTCGCCCAGCGTCGCACCGCCACCGCCACCGCCACCACAGCAGCAGCCGCAACCGCTGCATGCAGCACAGCATTTGGCGCAGCAGCAACAACAGCAAGCACAGCAACCGCCACCGCCGCCATACTTTCCGGCCGCAGCATTAGCTGCTTTGGCTGGCAGTCCGGCGGGACCGCATCATCCGGGTCTTTATAGCGCCGCGGGCGGTTTGCGTTTCCCGCCGCATCCAGGGCATCCGCATCCGCATTCGCATCCGCACGCCCACCATCCGCTGGGCAGTGCGTATACCACCGCcGAGGACGTGGTCCTCGCATCGGCCGTtGCCCATCAGCTGCATCCGGCGATGCGACcTCTGCGCGCCcTTCAGCCCGAGGAC
phenotype8pop119     AGCGTCTCGTCGCTGTTGACGGCGGGTAGCAACAACAACAACAGTATTAACGGTAGCGCAGCAGCAGCAGCGACGGCAGCAGCAGCAGCGGCAGCTCAGGCCTTAAGCTCACCAGATTCTGGAGCTGGCAATTATCGTAGCTCGCCGTCGCAGCTATCGCCACAAAGTAATCACAGCAATaaTAACAACAGTACTAACAACAACAACAACAACAACAATAGCAAAAATCACGAAGCTTTGAGCGTCTCACCCACAACAACAACAACAAATCGAACCACACCAACAACAACACCGCCAACACCACCGCCACAAGCAAGTGGAGCGCCAGCGCCACCACCACCACCGCCGTCGTCGTCGTCGTCATTACCCGCGCATCATTCGCCCAGCGTCGCACCGCCACCGCCACCGCCACCACAGcAGCAGCCGCAACCGCTGCATGCAGCACAGCATTTGGCGCAGCAGCAACAACAGCAAGCACAGCAACCGCCACCGCCGCCATACTTTCCGGCCGCAGCATTAGCTGCTTTGGCTGGCAGTCCGGCGGGACCGCATCATCCGGGTCTTTATAGCGCCGCGGGCGGTTTGCGTTTCCCGCCGCATCCAGGGCATCCGCATCCGCATTCGCATCCGCACGCCCACCATCCGCTGGGCAGTGCGTATACCACCGCCGAGGACGTGGTCCTCGCATCGGCCGTTGCCCATCAGCTGCATCCGGCGATGCGACctCTGCGCGCCcTTCAGCCCGAGGAC
phenotype8pop119     AGCGTCTCGTCGCTGTTGACGGCGGGTAGCAACAacAACAACAGTACTAACGGTAGCcCAGCAGCAGCAGCGACGGCAGCAGCAGCAGCGGCGGCTCAGGCCTTAAGCTCACCAGATTCTGGAGCTGGCAATTATCGTAGCTCGCCGTCGCAGCTATCGCCACAAAGTAATCACAGCAATaaTAACAACAGTACTAACAACAACAACAACAACAACAATAGCAAAAATCACGAAGCTTTGAGCGCCTCACCCACAACAACAACAACAAATCGAACCACACCAACAACAACACCGCCAACACCACCGCCACAAGCAAGTGGAGCGCCAGCGCCACCACCACCACCGCCGTCGTCGTCGTCGTCATTACCCGCGCATCATTCGCCCAGCGTCGCACCGCCACCGCCACCGCCACCACAGCAGCAGCCGCAACCGCTGCATGCAGCACAGCATTTGGCGCAGCAGCAACAACAGCAATCACAGCAACCGCCACCGCCGCCATACTTTCCGGCTGCAGCATTAGCTGCTTTGGCTGGCAGTCCGGCGGGACCGCATCATCCGGGTCTTTATAGCGCCGCGGGCGGTTTGCGTTTCCCGCCGCATCCAGCGCATCCGCATCCGCATTCGCATCCGCACGCCCACCATCCGCTGGGCAGTGCGTATACCACCGCCGAGGACGTGGTCCTCGCATCGGCCGTTGCCCATCAGCTGCATCCGGCGATGCGACCTCTGCGCGCCcTACAGCCCgAGGAC
phenotype5pop119     AGCGTCTCGTCGCTGTTGACGGCGGGTAGCAACAACAACAACAGTATTAACGGTAGCGcagcaGCAGCAGCGACGGCAGCAGCAGCAGCGGCAGCTCAGGCCTTAAGCTCACCAGATTCTGGAGCTGGCAATTATcGTAGCTCGCCGTCGCAGCTATCGCCACAAAGTAATCACAGCAATaaTAACAACAGTACTAACAACAACAACAACAACAACAATAGCAAAAATCACGAAGCTTTGAGCGTCTCACCCACAACAACAACAACAAATCGAACCACACCAACAACAACACCGCCAACACCACCGcCACAAGCAAGTGGAGCGCCAGCGCCACCACCACCACCGCCGTCGTCGTCGTCGTcATTACCCGCGCATCATTCGCCCAGCGTCGCACCGCCACCGCCACCGCCACCACAGCAGCAGCCGCAACCGCTGCATGCAGCACAGCATTTGGCGCAGCAGCAACAACAGcAAGCACAGCAACCGCCACCGCCGCCATACTTTCCGGCCGCAGCATTAGCTGCTTTGGCTGGCAGTCCGGCGGGACCGCATCATCCGGGTCTTTATAGCGCCGCGGGCGGTTTGCGTTTCCCGCCGCATCCAGGGCATCCGCATCCGCATTCGCATCCGCACGCCCACCATCCGCTGGGCAGTGCGTATACCACCGCCGAGGACGTGGTCCTCGCATCGGCCGTTGCCCATCAGCTGCATCCGGCGATGCGACCTCTGCGCGCCCtTCAGCCCGAGGAC
phenotype5pop119     AGCGTCTCGTCGCTGTTGACGGCGGGTAGCAACAACAACAACAGTACTAACGGTAGCcCAGCAGCAGCAGCGACGGCAGCAGCAGCAGCGGCGGCTCAGGCCTTAAGCTCACCAGATTCTGGAGCTGGCAATTATCGTAGCTCGCCGTCGCAGCTATCGCCACAAAGTAATCACAGCAATaaTAACAACAGTACTAACAACAACAACAACAACAACAATAGCAAAAATCACGAAGCTTTGAGCGCCTCACCCACAACAACAACAACAAATCGAACCACACCAACAACAACACCGCCAACACCACCGCCACAAGCAAGTGGAGCGCCAGCGCCACCACCACCACCGCCGTCGTCGTCGTCGTCATTACCCGCGCATCATTCGCCCAGCGTCGCACCGCCACCGCCACCGCCACCACAGCAGCAGCCGCAACCGCTGCATGCAGCACAGCATTTGGCGCAGCAGCAACAACAGCAATCACAGCAACCGCCACCGCCGCCATACTTTCCGGCTGCAGCATTAGCTGCTTTGGCTGGCAGTCCGGCGGGACCGCATCATCCGGGTCTTTATAGCGCCGCGGGCGGTTTGCGTTTCCCGCCGCATCCAGCGCATCCGCATCCGCATTCGCATCCGCACGCCCACCATCCGCTGGGCAGTGCGTATACCACCGCCGAGGACGTGGTCCTCGCATCGGCCGTTGCCCATCAGCTGCATCCGGCGATGCGACcTCTGCGCGCCcTACAGCCCgAGGAC
phenotype8popA       AGCGTCTCGTCGCTGTTGACGGCGGGTAGCAACAACAACAACAGTATTAACGGTAGCGCAGCAGCAGCAGCGACGGCAGCAGCAGCAGCGGCAGCTCAGGCCTTAAGCTCACCAGATTCTGGAGCTGGCAATTATCGTAGCTCGCCGTCGCAGCTATCGCCACAAAGTAATCACAGCAATaaTAACAACAGTACTAACAACAACAACAACAACAACAATAGCAAAAATCACGAAGCTTTGAGCGTCTCACCCACAACAACAACAACAAATCGAACCACACCAACAACAACACCGCCAACACCACCGCCACAAGCAAGTGGAGCGCCAGCGCCACCACCACCACCGCCGTCGTCGTCGTCGTCATTACCCGCGCATCATTCGCCCAGCGTCGCACCGCCACCGCCACCGCCACCACAGCAGCAGCCGCAACCGCTGCATGCAGCACAGCATTTGGCGCAGCAGCAACAACAGCAAGCACAGCAACCGCCACCGCCGCCATACTTTCCGGCCGCAGCATTAGCTGCTTTGGCTGGCAGTCCGGCGGGACCGCATCATCCGGGTCTTTATAGCGCCGCGGGCGGTTTGCGTTTCCCGCCGCATCCAGGGCATCCGCATCCGCATTCGCATCCGCACGCCCACCATCCGCTGGGCAGTGCGTATACCACCGCCGAGGACGTGgTCCTCGCATCGGcCGTTGCCCATCAGCTGCATCcGGCGATGCGACCTCTGCGCGCCCTTCAGCCCGAGGAC
phenotype8popA       AGCGTCTCGTCGCTGTTGACGGCGGGTAGCAACAACAACAACAGTATTAACGGTAGCGCAGCAGCAGCAGCGACGGCAGCAGCAGCAGCGGCAGCTCAGGCCTTAAGCTCACCAGATtCTGGAGcTGGCAATTATCGTAGCTCGCCGTCGCAGCTATCGCCACAAAGTAATCACAGCAATaaTAACAACAGTACTAACAACAACAACAACAACAACAATAGCAAAAATCACGAAGCTTTGAGCGTCTCACCCACAACAACAACAACAAATCGAACCACACCAACAACAACACCGCCAACACCACCGCCACAAGCAAGTGGAGCGCCAGCGCCACCACCACCACCGCCGTCGTCGTCGTCGTCATTACCCGCGCATCATTCGCCCAGCGTCGCACCGCCACCGCCACCGCCACCACAGCAGCAGCCGCAACCGCTGCATGCAGCACAGCATTTGGCGCAGCAGCAACAACAGCAAGCACAGCAACCGCCACCGCCGCCATACTTTCCGGCCGCAGCATTAGCTGCTTTGGCTGGCAGTCCGGCGGGACCGCATCATCCGGGTCTTTATAGCGCCGCGGGCGGTTTGCGTTTCCCGCCGCATCCAGGGCATCCGCATCCGCATTCGCATCCGCACGCCCACCATCCGCTGGGCAGTGCGTATACCACCGCCGAGGACGTGGTCCTCGCATCGGCCGTTGCCCATCAGCTGCATCCGGCGATGCGACCTCTGCGCGCCCTTCAGCCCGAGGAC
phenotype8popA       AGCGTCTCGTCGCTGTTGACGGCGGGTAGCAACAACAACAACAGTATTAACGGTAGCGCAGCAGCAGCAGCGACGGCAGCAGCAGCAGCGGCAGCTCAGGCCTTAAGCTCACCAGATTCTGGAGCTGGCAATTATCGTAGCTCGCCGTCGCAGCTATCGCCACaAAGTAATCACAGCAATaaTAACAACAGTACTAACAACAACAACAACAACAACAATAGCAAAAATCACGAAGCTTTGAGCGTCTCACCCACAACAACAACAACAAATCGAACCACACCAACAACAACACCGCCAACACCACCGCCACAAGCAAGTGGAGCGCCAGCGCCACCACCACCACCGCCGTCGTCGTCGTCGTCATTACCCGCGCATCATTCGCCCAGCGTCGCACCGCCACCGCCACCGCCACCACAGCAGCAGCCGCAACCGCTGCATGCAGCACAGCATTTGGCGCAGCAGCAACAACAGCAAGCACAGCAACCGCCACCGCCGCCATACTTTCCGGCCGCAGCATTAGCTGCTTTGGCTGGCAGTCCGGCGGGACCGCATCATCCGGGTCTTTATAGCGCCGCGGGCGGTTTGCGTTTCCCGCCGCATCCAGGGCATCCGCATCCGCATTCGCATCCGCACGCCCACCATCCGCTGGGCAGTGCGTATACCACCGCCGAGGACGTGGTCCTCGCATCGGCCGTTGCCCATCAGCTGCATCCGGCGATGCGACCTCTGCGCGCCCTTCAGCCCGAgGAC
phenotype8popA       AGCGTCTCGTCGCTGTTGACGGCGGGTAGCAACAACAACAACAGTATTAACGGTAGCGCAGCAGCAGCAGCGACGGCAGCAGCAGCAGCGGCAGCTCAGGCCTTAAGCTCACCAGATTCTGGAGCTGGCAATTATCGTAGCTCGCCGTCGCAGCTAtCGCCACAAAgTAATCACAGCAATaaTAACAACAGTACTAACAACAACAACAACAACAACAATAGCAAAAATCACGAAGCTTTGAGCGTCTCACCCACAACAACAACAACAAATCGAACCACACCAACAACAACACCGCCAACACCACCGCCACAAGCAAGTGGAGCGCCAGCGCCACCACCACCACCGCCGTCGTCGTCGTCGTCATTACCCGCGCATCATTCGCCCAGCGTCGCACCGCCACCGCCACCGCCACCACAGCAGCAGCCGCAACCGCTGCATGCAGCACAGCATTTGGCGCAGCAGCAACAACAGCAAGCACAGCAACCGCCACCGCCGCCATACTTTCCGGCCGCAGCATTAGCTGCTTTGGCTGGCAGTCCGGCGGGACCGCATCATCCGGGTCTTTATAGCGCCGCGGGCGGTTTGCGTTTCCCGCCGCATCCAGGGCATCCGCATCCGCATTCGCATCCGCACGCCCACCATCCGCTGGGCAGTGCGTATACCACCGCCGAGGACGTGGTCCTCGCATCGGCCGTTGCCCATCAGCTGCATCCGGCGATGCGACCTCTGCGCGCCcTTCAGCCCgagGAC
phenotype4popA       AGCGTCTCGTCGCTGTTGACGGCGGGTAGCAACAACAACAACAGTATTAACGGTAGCGCAGCAGCAGCAGCGACGGCAGCAGCAGCAGCGGCAGCTCAGGCCTTAAGCTCACCAGATTCTGGAGCTGGCAATTATCGTAGCTCGCCGTCGCAGCTATCGCCACAAAGTAATCACAGCAATaaTAACAACAGTACTAACAACAACAACAACAACAACAATAGCAAAAATCACGAAGCTTTGAGCGTCTCACCCACAACAACAACAACAAATCGAACCACACCAACAACAACACCGCCAACACCACCGCCACAAGCAAGTGGAGCGCCAGCGCCACCACCACCACCGCCGTCGTCGTCGTCGTCATTACCCGCGCATCATTCGCCCAGCGTCGCACCGCCACCGCCACCGCCACCACAGCAGCAGCCGCAACCGCTGCATGCAGCACAGCATTTGGCGCAGCAGCAACAACAGCAAGCACAGCAACCGCCACCGCCGCCATACTTTCCGGCCGCAGCATTAGCTGCTTTGGCTGGCAGTCCGGCGGGACCGCATCATCCGGGTCTTTATAGCGCCGCGGGCGGTTTGCGTTTCCCGCCGCATCCAGGGCATCCGCATCCGCATTCGCATCCGCACGCCCACCATCCGCTGGGCAGTGCGTATACCACCGCCGAGGACGTGGTCCTCGCATCGGCCGTTGCCCATCAGCTGCATCCGGCGATGCGACCTCTGCGCGCCCTTCAGCCCGAGGAC
phenotype5popB       AGCGTCTCGTCGCTGTTGACGGCGGGTAGCAACAACAACAACAGTATTAACGGTAGCGCAGCAGCAGCAGCGACGGCAGCAGCAGCAGCGGCAGCTCAGGCCTTAAGCTCACCAGATTCTGGAGCTGGCAATTATCGTAGCTCGCCGTCGCAGCTATCGCCACAAAGTAATCACAGCAATaaTAACAaCAGTACTAACAACAACAACAACAACAACAATAGCAAAAATCACGAAGCTTTGAGCGTCTCACCCACAACAACAACAACAAATCGAACCACACCAACAACAACACCGCCAACACCACCGCCACAAGCAAGTGGAGCGCCAgCGCCACCaCCACCACCGCCGTCGTCGTCGTCGTCATTACCCGCGCATCATTCGCCCAGCGTCGCACCGCCACCGCCACCGCCACCACAGCAGCAGCCGCAACCGCTGCATGCAGCACAGCATTTGGCGCAGCAGCAACAACAGCAAGCACAGCAAcCGCCACCGCCGCCATACTTTCCGGCCGCAGCATTAGCTGCTTTGGCTGGCAGTCCGGCGGGACCGCATCATCCGGGTCTTTATAGCGCCGCGGGCGGTTTGCGTTTCCCGCCGCATCCAGGGCATCCGCATCCGCATTCGCATCCGCACGCCCACCATCCGCTGGGCAGTGCGTATACCACCGCCGAgGACGTGGTCCTCGCATCGGCCGTTGCCCATCAGCTGCATCCGGcGATGCGACCTcTGCGCGCCctTCAGCCCgAGGAC
phenotype7popB       AGCGTCTCGTCGCTGTTGACGGcGGGTAGCAACAACAACAACAGTATTAACGGTAGCGCAGCAGCAGCAGCGACGGCAGCAGCAGCAGCGGCAGCTCAgGCCTTAAGCTCACCAGATTCTGGAGCTGGCAATTATCGTAGCTCGCCGTCGCAGCTATCGCCACAAAGTAATCACAGCAATaaTAACAACAGTACTAACAACAACAACAACAACAACAATAGCAAAAATCACGAAGCTTTGAGCGTCTCACCCACAACAACAACAACAAATCGAACCACACCAACAACAACACCGCCAACACCACCGCCACAAGCAAGTGGAGCGCCAGCGCCACCACCACCACCGCCGTCGTCGTCGTCGTCATTACCCGCGCATCATTCGCCCAGCGTCGCACCGCCACCGCCACCGCCACCACAGCAGCAGCCGCAACCGCTGCATGCAGCACAGCATTTGGCGCAGCAGCAACAACAGCAAGCACAGCAACCGCCACCGCCGCCATACTTTCCGGCCGCAGCATTAGCTGCTTTGGCTGGCAGTCCGGCGGGACCGCATCATCCGGGTCTTTATAGCGCCGCGGGCGGTTTGCGTTTCCCGCCGCATCCAGGGCATCCGCATCCGCATTCGCATCCGCACGCCCACCATCCGCTGGGCAGTGCGTATACCACCGCCGAGGACGTGGTCCTCGCATCGGCCGTTGCCCATCAGCTGCATCCGGCGATGCGACCTCTGCGCGCCcTTCAGcCCGAGGAC
phenotype7popB       AGCGTCTCGTCGCTGTTGACGGCGGGTAGCAACAACAACAACAGTATTAACGGTAGCGCAGCAGCAGCAGCGACGGCAGCAGCAGCAGCGGCAGCTCAGGCCTTAAGCTCACCAGATTCTGGAGCTGGCAATTATCGTAGCTCGCCGTCGCAGCTATCACCACAAAGTAATCACAGCAATaaTAACAACAGTACTAACAACAACAACAACAACAACAATAGCAAAAATCACGAAGCTTTGAGCGTCTCACCCACAACAACAACAACAAATCGAACCACACCAACAACAACACCGCCAACACCACCGCCACAAGCAAGTGGAGCGCCAGCGCCACCACCACCACCGCCGTCGTCGTCGTCGTCATTACCCGCGCATCATTCGCCCAGCGTCGCACCGCCACCGCCACCGCCACCACAGCAGCAGCCGCAACCGCTGCATGCAGCACAGCATTTGGCGCAGCAGCAACAACAGCAAGCACAGCAACCGCCACCGCCGCCATACTTTCCGGCCGCAGCATTAGCTGCTTTGGCTGGCAGTCCGGCGGGACCGCATCATCCGGGTCTTTATAGCGCCGCGGGCGGTTTGCGTTTCCCGCCGCATCCAGGGCATCCGCATCCGCATTCGCATCCGCACGCCCACCATCCGCTGGGCAGTGCGTATACCACCGCCGAGGACGTGGTCCTCGCATCGGCCGTTGCCCATCAGCTGCATCCGGCGATGCGACCTCTGCGCGCCCTTCAGCCCGAGGAC
phenotype8popB       AGCGTCTCGTCGCTGTTGACGGCGGGTAGCAACAACAACAACAGTATTAACGGTAGCGCAGCAGCAGCAGCGACGGCAGCAGCAGCAGCGGCAGCTCAGGCCTTAAGCTCACCAGATTCTGGAGCTGGCAATTATCGTAGCTCGCCGTCGCAGCTATCGCCACAAAGTAATCACAGCAATaaTAACAACAGTACTAACAACAACAACAACAACAACAATAGCAAAAATCACGAAGCTTTGAGCGTCTCACCCACAACAACAACAACAAATCGAACCACACCAACAACAACACCGCCAACACCACCGCCACAAGCAAGTGGAGCGCCAGCGCCACCACCACCACCGCCGTCGTCGTCGTCGTCATTACCCGCGCATCATTCGCCCAGCGTCGCACCGCCACCGCCACCGCCACCACAGCAGCAGCCGCAACCGCTGCATGCAGCACAGCATTTGGCGCAGCAGCAACAACAGCAAGCACAGCAACCGCCACCGCCGCCATACTTTCCGGCCGCAGCATTAGCTGCTTTGGCTGGCAGTCCGGCGGGACCGCATCATCCGGGTCTTTATAGCGCCGCGGGCGGTTTGCGTTTCCCGCCGCATCCAGGGCATCCGCATCCGCATTCGCATCCGCACGCCCACCATCCGCTGGGCAGTGCGTATACCACCGCCGAGGACGTGGTCCTCGCATCGGCCGTTGCCCATCAGCTGCATCCGGCGATGCGACCTCTGCGCGCCCTTCAGCCCGAGGAC
phenotype8popB       AGCGTCTCGTCGCTGTTGACGGCGGGTAGCAACAACAACAACAGTATTAACGGTAGCGCAGCAGCAGCAGCGACGGCAGCAGCAGCAGCGGCAGCTCAgGCCTTAAGCTCACCAGATTCTGGAGCTGGCAATTATCGTAGCTCGCCGTCGCAGCTATCGCCACAAAGTAATCACAGCAATaaTAACAACAGTACTAACAACAACAACAACAACAACAATAGCAAAAATCACGAAGCTTTGAGCGTCTCACCCACAACAACAACAACAAATCGAACCACACCAACAACAACACCGCCAACACCACCGCCACAAGCAAGTGGAGCGCCAGCGCCACCACCACCACCGCCGTCGTCGTCGTCGTCATTACCCGCGCATCATTCGCCCAGCGTCGCACCGCCACCGCCACCGCCACCACAGCAGCAGCCGCAACCGCTGCATGCAGCACAGCATTTGGCGCAGCAGCAACAACAGCAAGCACAGCAACCGCCACCGCCGCCATACTTTCCGGCCGCAGCATTAGCTGCTTTGGCTGGCAGTCCGGCGGGACCGCATCATCCGGGTCTTTATAGCGCCGCGGGCGGTTTGCGTTTCCCGCCGCATCCAGGGCATCCGCATCCGCATTCGCATCCGCACGCCCACCATCCGCTGGGCAGTGCGTATACCACCGCCGAGGACGTGGTCCTCGCATCGGCCGTTGCCCATCAGCTGCATCCGGCGATGCGACCTCTGCGCGCCCTTCAGCCCGAGGAC
phenotype9popB       AGCGTCTCGTCGCTGTTGACGGcGGGTAGCAACAACAACAACAGTATTAACGGTAGCGCAGCAGCAGCAGCGACGGCAGCAGCAGCAGCGGCAGCTCAGGCCTTAAGCTCACCAGATTCTGGAGCTGGCAATTATCGTAGCTCGCCGTCGCAGCTATCGCCACAAAGTAATCACAGCAATaaTAACAACAGTACTAACAACAACAACAACAACAACAATAGCAAAAATCACGAAGCTTTGAGCGTCTCACCCACAACAACAACAACAAATCGAACCACACCAACAACAACACCGCCAACACCACCGCCACAAGCAAGTGGAGCGCCAGCGCCACCACCACCACCGCCGTCGTCGTCGTCGTCATTACCCGCGCATCATTCGCCCAGCGTCGCACCGCCACCGCCACCGCCACCACAGCAGCAGCCGCAACCGCTGCATGCAGCACAGCATTTGGCGCAGCAGCAACAACAGCAAGCACAGCAACCGCCACCGCCGCCATACTTTCCGGCCGCAGCATTAGCTGCTTTGGCTGGCAGTCCGGcGGGACCGCATCATCCGGGTCTTTATAGCGCCGCGGGCGGTTTGCGTTTCCCGCCGCATCCAGGGCATCCGCATCCGCATTCGCATCCGCACGCCCACCATCCGCTGGGCAGTGCGTATACCACCGCCGAGGACGTGGTCCTCGCATCGGCCGTTGCCCATCAGCTGCATCCGGCGATGCGACCTCTGCGCGCCCTTCAGCCCGAGGAC
phenotype5popC       AGCGTCTCGTCGCTGTTGACGGCGGGTAGCAACAACAACAACAGTATTAACGGTAGCGCAGCAGCAGCAGCGACGGCAGCAGCAGCAGCGGCAGCTCAGGCCTTAAGCTCACCAGATTCTGGAGCTGGCAATTATCGTAGCTCGCCGTCGCAGCTATCGCCACAAAGTAATCACAGCAATaaTAACAACAGTACTAACAACAACAACAACAACAACAATAGCAAAAATCACGAAGCTTTGAGCGTCTCACCCACAACAACAACAACAAATCGAACCACACCAACAACAACACCGCCAACACCACCGCCACAAGCAAGTGGAGCGCCAGCGCCACCACCACCACCGCCGTCGTCGTCGTCGTCATTACCCGCGCATCATTCGCCCAGCGTCGCACCGCCACCGCCACCGCCACCACAGCAGCAGCCGCAACCGCTGCATGCAGCACAGCATTTGGCGCAGCAGCAACAACAGCAAGCACAGCAACCGCCACCGCCGCCATACTTTCCGGCCGCAGCATTAGCTGCTTTGGCTGGCAGTCCGGCGGGACCGCATCATCCGGGTCTTTATAGCGCCGCGGGCGGTTTGCGTTTCCCGCCGCATCCAGGGCATCCGCATCCGCATTCGCATCCGCACGCCCACCATCCGCTGGGCAGTGCGTATACCACCGCCGAGGACGTGGTCCTCGCATCGGCCGTTGCCCATCAGCTGCATCCGGCGATGCGACCTCTGCGCGCCCTTCAGCCCGAGGAC
phenotype9popC       AGCGTCTCGTCGCTGTTGACGGCGGGTAGCAACAACAACAACAGTATTAACGGTAGCGCAGCAGCAGCAGCGACGGCAGCAGCAGCAGCGGCAGCTCAGGCCTTAAGCTCACCAGATTCTGGAGCTGGCAATTATCGAAGCTCGCCGTCGCAGCTATCGCCACAAAGTAATCACAGCAATaaTAACAACAGTACTAACAACAACAACAACAACAACAATAGCAAAAATCACGAAGCTTTGAGCGTCTCACCCACAACAACAACAACAAATCGAACCACACCAACAACAACACCGCCAACACCACCGCCACAAGCAAGTGGAGCGCCAGCGCCACCACCACCACCGCCGTCGTCGTCGTCGTCATTACCCGCGCATCATTCGCCCAGCGTCGCACCGCCACCGCCACCGCCACCACAGCAGCAGCCGCAACCGCTGCATGCAGCACAGCATTTGGCGCAGCAGCAACAACAGCAAGCACAGCAACCGCCACCGCCGCCATACTTTCCGGCCGCAGCATTAGCTGCTTTGGCTGGCAGTCCGGCGGGACCGCATCATCCGGGTCTTTATAGCGCCGCGGGCGGTTTGCGTTTCCCGCCGCATCCAGGGCATCCGCATCCGCATTCGCATCCGCACGCCCACCATCCGCTGGGCAGTGCGTATACCACCGCCGAGgACGTGGTCCTCGCATCGGCCGTTGCCCATCAGCTGCATCCGGCGATGCGACCTCTGCGCGCCCTTCAGCCCGAGGAC
phenotype9popC       AGCGTCTCGTCGCTGTTGACGGCGGGTAGCAACAACAACAACAGTATTAACGGTAGCGCAGCAGCAGCAGCGACGGCAGCAGCAGCAGCGGCAGCTCAGGCCTTAAGCTCACCAGATTCTGGAGCTGGCAATTATCGTAGCTCGCCGTCGCAGCTATCGCCACAAAGTAATCACAGCAATaaTAACAACAGTACTAACAACAACAACAACAACAACAATAGCAAAAATCACGAAGCTTTGAGCGTCTCACCCACAACAACAACAACAAATCGAACCACACCAACAACAACACCGCCAACACCACCGCCACAAGCAAGTGGAGCGCCAGCGCCACCACCACCACCGCCGTCGTCGTCGTCGTCATTACCCGCGCATCATTCGCCCAGCGTCGCACCGCCACCGCCACCGCCACCACAGCAGCAGCCGCAACCGCTGCATGCAGCACAGCATTTGGCGCAGCAGCAACAACAGCAAGCACAGCAACCGCCACCGCCGCCATACTTTCCGGCCGCAGCATTAGCTGCTTTGGCTGGCAGTCCGGCGGGACCGCATCATCCGGGTCTTTATAGCGCCGCGGGCGGTTTGCGTtTCCCGCCGCATCCAGGGCATCCGCATCCGCATTCGCATCCGCACGCCCACCATCCGCTGGGCAGTGCGTATACCACCGCCGAGGACGTGGTCCTCGCATCGGCCGTTGCCCATCAGCTGCATCCGGCGATGCGACCTCTGCGCGCCCTTCAGCCCGAGGAC
phenotype8popC       AGCGTCTCGTCGCTGTTGAcGGCGGGTAGCAACAACAACAACAGTATTAACGGTAGCGCAGCAGCAGCAGCGACGGCAGCAGCAGCAGCGGCAGCTCAGGCCTTAAGCTCACCAGATTCTGGAGCTGGCAATTATCGTAGCTCGCCGTCGCAGCTATCGCCACAAAGTAATCACAGCAATaaTAACAACAGTACTAACAACAACAACAACAACAACAATAGCAAAAATCACGAAGCTTTGAGCGTCTCACCCACAACAACAACAACAAATCGAACCACACCAACAACAACACCGCCAACACCACCGCCACAAGCAAGTGGAGCGCCAGCGCCACCACCACCACCGCCGTCGTCGTCGTCGTCATTACCCGCGCATCATTCGCCCAGCGTCGCACCGCCACCGCCACCGCCACCACAGCAGCAGCCGCAACCGCTGCATGCAGCACAGCATTTGGCGCAGCAGCAACAACAGCAAGCACAGCAACCGCCACCGCCGCCATACTTTCCGGCCGCAGCATTAGCTGCTTTGGCTGGCAGTCCGGCGGGACCGCATCATCCGGGTCTTTATAGCGCCGCGGGCGGTTTGCGTTTCCCGCCGCATCCAGGGCATCCGCATCCGCATTCGCATCCGCACGCCCACCATCCGCTGGGCAGTGCGTATACCACCGCCGAGGACGTGGTCCTCGCATCGGCCGTTGCCCATCAGCTGCATCCGGCGATGCGACCTCTGCGCGCCCTTCAGCCCGAGGAC
phenotype8popC       AGCGTCTCGTCGCTGTTGACGGCGGGTAGCAACAACAACAACAGTATTAACGGTAGCGCAGCAGCAGCAGCGACGGCAGCAGCAGCAGCGGCAGCTCAGGCCTTAAGCTCACCAGATTCTGGAGCTGGCAATTATCGTAGCTCGCCGTCGCAGCTATCGCCACAAAGTAATCACAGCAATaaTAACAACAGTACTAACAACAACAACAACAACAACAATAGCAAAAATCACGAAGCTTTGAGCGTCTCACCCACAACAACAACAACAAATCGAACCACACCAACAACAACACCGCCAACACCACCGCCACAAGCAAGTGGAGCGCCAGCGCCACCACCACCACCGCCGTCGTCGTCGTCGTCATTACCCGCGCATCATTCGCCCAGCGTCGCACCGCCACCGCCACCGCCACCACAGCAGCAGCCGCAACCGCTGCATGCAGCACAGCATTTgGCGCAGCAGCAACAACAGCAAGCACAGCAACCGCCACCGCCGCCATACTTTCCGGCCGCAGCATTAGCTGCTTTGGCTGGCAGTCCGGCGGGACCGCATCATCCGGGTCTTTATAGCGCCGCGGGCGGTTTGCGTTTCCCGCCGCATCCAGGGCATCCGCATCCGCATTCGCATCCGCACGCCCACCATCCGCTGGGCaGTGCGTATACCACCGCCGAGGACGTGGTCCTCGCATCGGCCGTTGCCCATCAGCTGCATCCGGCGATGCGACCTCTGCGCGCCCTTCAGCCCGAgGAC
phenotype8popC       AGCGTCTCGTCGCTGTTGACGGcGGGTAGCAACAACAACAACAGTATTAACGGTAGCGCAGCAGCAGCAGCGACGGCAGCAGCAGCAGCGGCAGCTCAGGCCTTAAGCTCACCAgATTCTGGAGCTGGCAATTATCGTAGCTCGCCGTCGCAGCTATCGCCACAAAGTAATCACAGCAATaaTAACAACAGTACTAACAACAACAACAACAACAACAATAGCAAAAATCACGAAGCTTTGAGCGTCTCACCCACAACAACAACAACAAATCGAACCACACCAACAACAACACCGCCAACACCACCGCCACAAGCAAGTGGAGCGCCAGCGCCACCACCACCACCGCCGTCGTCGTCGTCGTCATTACCCGCGCATCATTCGCCCAGCGTCGCACCGCCACCGCCACCGCCACCACAGCAGCAGCCGCAACCGCTGCATGCAGCACAGCATTTGGCGCAGCAGCAACAACAGCAAGCACAGCAACCGCCACCGCCGCCATACTTTCCGGCCGCAGCATtAGCTGCTTTGGCTGGCAGTCCGGCGGGACCGCATCATCCGGGTCTTTATAGCGCCGCGGGCGGTTTGCGTTTCCCGCCGCATCCAGGGCATCCGCATCCGCATTCGCATCCGCACGCCCACCATCCGCTGGGCAGTGCGTATACCACCGCCGAGGACGTGGTCCTCGCATCGGCCGTTGCCCATCAGCTGCATCCGGCGATGCGACCTCTGCGCGCCcTTCAGCCCgAGgAC
phenotype8popC       AGCGTCTCGTCGCTGTTGACGGcGGGTAGCAACAACAACAACAGTATTAACGGTAGCGCAGCAGCAGCAGCGACGGCAGCAGCAGCAGCGGCAGCTCAGGCCTTAAGCTCACCAGATTCTGGAGCTGGCAATTATCGTAGCTCGCCGTCGCAGCTATCGCCACAAAGTAATCACAGCAATaaTAACAACAGTACTAACAACAACAACAACAACAACAATAGCAAAAATCACGAAGCTTTGAGCGTCTCACCCACAACAACAACAACAAATCGAACCACACCAACAACAACACCGCCAACACCACCGCCACAAGCAAGTGGAGCGCCAGCGCCACCACCACCACCGCCGTCGTCGTCGTCGTCATTACCCGCGCATCATTCGCCCAGCGTCGCACCGCCACCGCCACCGCCACCACAGCAGCAGCCGCAACCGCTGCATGCAGCACAGCATTTGGCGCAGCAGCAACAACAGCAAGCACAGCAACCGCCACCGCCGCCATACTTTCCGGCCGCAGCATTAGCTGCTTTGGCTGGCAGTCCGGCGGGACCGCATCATCCGGGTCTTTATAGCGCCGCGGGCGGTTTGCGTTTCCCGCCGCATCCAGGGCATCCGCATCCGCATTCGCAtCCGCACGCCCACCATCCGCTGGGCAGTGCGTATACCACCGCCGAGGACGTGGTCCTCGCATCGGCCGTTGCCCATCAGCTGCATCCGGCGATGCGACCTCTGCGCGCCcTTCAGCCCGAGGAC
phenotype4popD       AGCGTCTCGTCGCTGTTGACGGCGGGTAGCAACAACAACAACAGTATTAACGGTAGTGCAGCAGCAGCAGCGACGGCAGCAGCAGCAGCGGCAGCTCAGGCCTTAAGCTCACCAGATTCTGGAGCTGGCAATTATCGTAGCTCGCCGTCGCAgCTaTCGCCACaAAGTAATCACAGCAATaaTAACAACAGTACTAACAACAACAACAACAACAACAATAGCAAAAATCACGAAGCTTTGAGCGTCTCACCCACAACAACAACAACAAATCGAACCACACCAACAACAACACCGCCAACACCACCGCCACAAGCAAGTGGAGCGCCAGCGCCACCACCACCACCGCCGTCGTCGTCGTCGTCATTACCCGCGCATCATTCGCCCAGCGTCGCACCGCCACCGCCACCGCCACCACAGCAGCAGCCGCAACCGCTGCATGCAGCACAGCATTTGGCGCAGCAGCAACAACAGCAAGCACAGCAACCGCCACCGCCGCCATACTTTCCGGCCGCAGCATTAGCTGCTTTGGCTGGCAGTCCGGCGGGACCGCATCATCCGGGTCTTTATAGCGCCGCGGGCGGTTTGCGTTTCCCGCCGCATCCAGGGCATCCGCATCCGCATTCGCATCCGCACGCCCACCATCCGCTGGGCAGTGCGTATACCACCGCCGAGGACGTGGTCCTCGCATCGGCCGTTGCCCATCAGCTGCATCCGGCGATGCGACCTCTGCGCGCCCTTCAGCCCGAgGAc
phenotype4popD       AGCGTCTCGTCGCTGTTGACGGCGGGTAGCAACAACAACAACAGTATTAACGGTAGCGCAGCAGCAGCAGCGACGGCAGCAGCAGCAGCGGCAGCTCAGGCCTTAAGCTCACCAGATTCTGGAGCTGGCAATTATCGTAGCTCGCCGTCGCAGCTATCGCCACAAAGTAATCACAGCAATaaTAACAACAGTACTAACAACAACAACAACAACAACAATAGCAAAAATCACGAAGCTTTGAGCGTCTCACCCACAACAACAACAACAaATCGAACCACACCAACAACAACACCGCCAACACCACCGCCACAAGCAAGTGGAGCGCCAGCGCCACCACCACCACCGCCGTCGTCGTCGTCGTCATTACCCGCGCATCATTCGCCCAGCGTCGCACCGCCACCGCCACCGCCACCACAGCAGCAGCCGCAACCGCTGCATGCAGCACAGCATTTGGCGCAGCAGCAACAACAGCAAGCACAGCAACCGCCACCGCCGCCATACTTTCcGGCCGCAGCATTAGCTGCTTTGGCTGGCAGTCCGGCGGGACCGCATCATCCGGGTCTTTATAGCGCCGCGGGCGGTTTGCGTTTCCCGCCGCATCCAGGGCATCCGCATCCGCATTCGCATCCGCACGCCCACCATCCGCTGGGCAGTGCGTATACCACCGCCGAGGACGTGGTCCTCGCATCGGCCGTTGCCCATCAGCTGCATCCGGCGATGCGACCTCTGCGCGCCCTTCAGCCCGAGGAC
phenotype8popD       AGCGTCTCGTCGCTGTTGACGGCGGGTAGCAACAACAACAACAGTATTAACGGTAGCGCAGCAGCAGCAGCGACGGCAGCAGCAGCAGCGGCAGCTCAGGCCTTAAGCTCACCAGATTCTGGAGCTGGCAATTATCGTAGCTCGCCGTCGCAGCTATCGCCACAAAGTAATCACAGCAATaaTAACAACAGTACTAACAACAACAACAACAACAACAATAGCAAAAATCACGAAGCTTTGAGCGTCTCACCCACAACAACAACAACAAATCGAACCACACCAACAACAACACCGCCAACACCACCGCCACAAGCAAGTGGAGCGCCAGCGCCACCACCACCACCGCCGTCGTCGTCGTCGTCATTACCCGCGCATCATTCGCCCAGCGTCGCACCGCCACCGCCACCGCCACCACAGCAGCAGCCGCAACCGCTGCATGCAGCACAGCATTTGGCGCAGCAGCAACAACAGCAAGCACAGCAACCGCCACCGCCGCCATACTTTCCGGCCGCAGCATTAGCTGCTTTGGCTGGCAGTCCGGCGGGACCGCATCATCCGGGTCTTTATAGCGCCGCGGGCGGTTTGCGTTTCCCGCCGCATCCAGGGCATCCGCATCCGCATTCGCATCCGCACGCCCACCATCCGCTGGGCAGTGCGTATACCACCGCCGAgGACGTgGTCCTCGCATCGGCCGTTGCCCATCAgCTGCATCCGGCGATGCGACCTCTGCGCGCCCTTCAGCCCGAGGAC
phenotype8popD       AGCGTCTCGTCGCTGTTGACGGCGGGTAGCAACAACAACAACAGTATTAACGGTAGCGCaGCAGCAGCAGCGaCGGCAGCAGCAGCAGCGGCAGCTCAGGCCTTAAGCTCACCAGATTCTGGAGCTGGCAATTATCGTAGCTCGCCGTCGCAGCTATCGCCACAAAGTAATCACAGCAATaaTAACAACAGTACTAACAACAACAACAACAACAACAATAGCAAAAATCACGAAGCTTTGAGCGTCTCACCCACAACAACAACAACAAATCGAACCACACCAACAACAACACCGCCAACACCACCGCCACAAGCAAGTGGAGCGCCAGCGCCACCACCACCACCGCCGTCGTCGTCGTCGTCATTACCCGCGCATCATTCGCCCAGCGTCGCACCGCCACCGCCACCGCCACCACAGCAGCAGCCGCAACCGCTGCATGCAGCACAGCATTTGGCGCAGCAGCAACAACAGCAAGCACAGCAACCGCCACCGCCGCCATACTTTCCGGCCGCAGCATTAGCTGCTTTGGCTGGCAGTCCGGCGGGACCGCATCATCCGGGTCTTTATAGCGCCGCGGGCGGTTTGCGTTTcCCGCCGCATCCAGGGCATCCGCATCCGCATTCGCATCCGCACGCCCACCATCCGCTGGGCAGTGCGTATACCACCGCCGAGGACGTGGTCCTCGCATCGGCCGTTGCCCATCAgCTGCATCCGGCGATGCGACCTCTGCGCGCCcTTCAGCCCgAGGAC
phenotype8popD       AGCGTCTCGTCGCTGTTGACGGCGGGTAGCAACAACAACAACAGTATTAACGGTAGCGCAGCAGCAGCAGCGACGGCAGCAGCAGCAGCGGCAGCTCAGGCCTTAAGCTCACCAGATTCTGGAGCTGGCAATTATCGTAGCTCGCCGTCGCAGCTATCGCCACAAAGTAATCACAGCAATaaTAACAACAGTACTAACAACAACAACAACAACAACAATAGCAAAAATCACGAAGCTTTGAGCGTCTCACCCACAACAACAACAACAAATCGAACCACACCAACGACAACACCGCCAACACCACCGCCACAAGCAAGTGGAGCGCCAGCGCCACCACCACCACCGCCGTCGTCGTCGTCGTCATTACCCGCGCATCATTCGCCCAGCGTCGCACCGCCACCGCCACCGCCACCACAGCAGCAGCCGCAACCGCTGCATGCAGCACAGCATTTGGCGCAGCAGCAACAACAGCAAGCACAGCAACCGCCACCGCCGCCATACTTTCCGGCCGCAGCATTAGCTGCTTTGGCTGGCAGTCCGGCGGGACCGCATCATCCGGGTCTTTATAGCGCCGCGGGCGGTTTGCGTTTCCCGCCGCATCCAGGGCATCCGCATCCGCATTCGCATCCGCACGCCCACCATCCGCTGGGCAGTGCGTATACCACCGCCGAgGACGTGGTCCTCGCATCGGCCGTTGCCCATCAGCTGCATCCGGCGATGCGACCTCTGCGCGCCCTtCAGCCCgAGGAC
phenotype7popF       AGCGTCTCGTCGCTGTTGACGGCGGGTAGCAACAACAACAACAGTATTAACGGTAGCGCAGCAGCAGCAGCGACGGCAGCAGCAGCAGCGGCAGCTCAGGCCTTAAGCTCACCAGATTCTGGAGCTGGCAATTATCGAAGCTCGCCGTCGCAGCTATCGCCACAAAGTAATCACAGCAATaaTAACAACAGTACTAACAACAACAACAACAACAACAATAGCAAAAATCACGAAGCTTTGAGCGTCTCACCCACAACAACAACAACAAATCGAACCACACCAACAACAACACCGCCAACACCACCGCCACAAGCAAGTGGAGCGCCAGCGCCACCACCACCACCGCCGTCGTCGTCGTCGTCATTACCCGCGCATCATTCGCCCAGCGTCGCACCGCCACCGCCACCGCCACCACAGCAGCAGCCGCAACCGCTGCATGCAGCACAGCATTTGGCGCAGCAGCAACAACAGCAAGCACAGCAACCGCCACCGCCGCCATACTTTCCGGCCGCAGCATTAGCTGCTTTGGCTGGCAGTCCGGCGGGACCGCATCATCCGGGTCTTTATAGCGCCGCGGGCGGTTTGCGTTTCCCGCCGCATCCAGGGCATCCGCATCCGCATTCGCATCCGCACGCCCACCATCCGCTGGGCAGTGCGTATACCACCGCCGAGGACGTGGTCCTCGCATCGGCCGTTGCCCATCAGCTGCATCCGGCGATGCGACCTCTGCGCGCCCTTCAGCCCGAgGAC
phenotype7popF       AGCGTCTCGTCGCTGTTGACGGCGGGTAGCAACAACAACAACAGTATTAACGGTAGCGCAGCAGCAGCAGCGACGGCAGCAGCAGCAGCGGCAGCTCAGGCCTTAAGCTCACCAgATTCTGGAGCTGGCAATTATCGTAGCTCGCCGTCGCAGCTATCGCCACAAAGTAATCACAGCAATaaTAACAACAGTACTAACAACAACAACAACAACAACAATAGCAAAAATCACGAAGCTTTGAGCGTCTCACCCACAACAACAACAACAAATCGAACCACACCAACAACAACACCGCCAACACCACCGCCACAAGCAAGTGGAGCGCCAGCGCCACCACCACCACCGCCGTCGTCGTCGTCGTCATTACCCGCGCATCATTCGCCCAGCGTCGCACCGCCACCGCCACCGCCACCACAGCAGCAGCCGCAACCGCTGCATGCAGCACAGCATTTGGCGCAGCAGCAACAACAGCAAGCACAGCAACCGCCACCGCCGCCATACTTTCCGGCCGCAGCATTAGCTGCTTTGGCTGGCAGTCCGGCGGGACCGCATCATCCGGGTCTTTATAGCGCCGCGGGCGGTTTGCGTTTCCCGCCGCATCCAGGGCATCCGCATCCGCATTCGCATCCGCACGCCCACCATCCGCTGGGCAGTGCGTATACCACCGCCGAGGACGTGGTCCTCGCATCGGCCGTTGCCCATCAGCTGCATCCGGCGATGCGACcTCTGCGCGCCCTTCAGCCCGAGGAC
phenotype7popFn      AGCGTCTCGTCGCTGTTGACGGCGGGTAGCAACAACAACAACAGTATTAACGGTAGCGCAGCAGCAGCAGCGACGGCAGCAGCAGCAGCGGCAGCTCAGGCCTTAAGCTCACCAGATTCTGGAGCTGGCAATTATCGAAGCTCGCCGTCGCAGCTATCGCCACAAAGTAATCACAGCAATaaTAACAACAGTACTAACAACAACAACAACAACAACAATAGCAAAAATCACGAAGCTTTGAGCGTCTCACCCACAACAACAACAACAAATCGAACCACACCAACAACAACACCGCCAACACCACCGCCACAAGCAAGTGGAGCGCCAGCGCCACCACCACCACCGCCGTCGTCGTCGTCGTCATTACCCGCGCATCATTCGCCCAGCGTCGCACCGCCACCGCCACCGCCACCACAGCAGCAGCCGCAACCGCTGCATGCAGCACAGCATTTGGCGCAGCAGCAACAACAGCAAGCACAGCAACCGCCACCGCCGCCATACTTTCCGGCCGCAGCATTAGCTGCTTTGGCTGGCAGTCCGGCGGGACCGCATCATCCGGGTCTTTATAGCGCCGCGGGCGGTTTGCGTTTCCCGCCGCATCCAGGGCATCCGCATCCGCATTCGCATCCGCACGCCCACCATCCGCTGGGCAGTGCGTATACCACCGCCGAGGACGTGGTCCTCGCATCGGCCGTTGCCCATCAGCTGCATCCGGCGATGCGACCTCTGCGCGCCCTTCAGCCCGAGGAC
phenotype8popFn      AGCGTCTCGTCGCTGTTGACGGCGGGTAGCAACAACAACAACAGTATTAACGGTAGCGCAGCAGCAGCAGCGACGGCAGCAGCAGCAGCGGCAGCTCAGGCCTTAAGCTCACCAGATTCTGGAGCTGGCAATTATCGTAGCTCGCCGTCGCAGCTATCGCCACAAAGTAATCACAGCAATaaTAACAACAGTACTAACAACAACAACAACAACAACAATAGCAAAAATCACGAAGCTTTGAGCGTCTCACCCACAACAACAACAACAAATCGAACCACACCAAcAACAACACCGCCAACACCACCGCCACAAGCAAGTGGAGCGCCAGCGCCACCACCACCACCGCCGTCGTCGTCGTCGTCATTACCCGCGCATCATTCGCCCAGCGTCGCACCGCCACCGCCACCGCCACCACAGCAGCAGCCGCAACCGCTGCATGCAGCACAGCATTTGGCGCAGCAGCAACAACAGCAAGCACAGCAACCGCCACCGCCGCCATACTTTCCGGCCGCAGCATTAGCTGCTTTGGCTGGCAGTCCGGCGGGACCGCATCATCCGGGTCTTTATAGCGCCGCGGGCGGTTTGCGTTTCCCGCCGCATCCAGGGCATCCGCATCCGCATTCGCATCCGCACGCCCACCATCCGCTGGGCAGTGCGTATACCACCGCCGAggACGTGGTCCTCGCATCGGCCGTTGCCCATCAGCTGCATCCGGCGATGCGACCTCTGCGCGCCCTTCAGCCCGAGGAC
phenotype9popFn      AGCGTCTCGTCGCTGTTGACGGCGGGTAGCAACAACAACAACAGTACTAACGGTAGCCCAGCAGCAGCAGCGACGGCAGCAGCAGCAGCGGCGGCTCAGGCCTTAAGCTCACCAGATTCTGGAGCTGGCAATTATCGTAGCTCGCCGTCGCAGCTATCGCCACAAAGTAATCACAGCAATaaTAACAACAGTACTAACAACAACAACAACAACAACAATAGCAAAAATCACGAAGCTTTGAGCGCCTCACCCACAACAACAACAACAAATCGAACCACACCAACAACAACACCGCCAACACCACCGCCACAAGCAAGTGGAGCGCCAGCGCCACCACCACCACCGCCGTCGTCGTCGTCGTCATTACCCGCGCATCATTCGCCCAGCGTCGCACCGCCACCGCCACCGCCACCACAGCAGCAGCCGCAACCGCTGCATGCAGCACAGCATTTGGCGCAGCAGCAACAACAGCAATCACAGCAACCGCCACCGCCGCCATACTTTCCGGCTGCAGCATTAGCTGCTTTGGCTGGCAGTCCGGCGGGACCGcATCATCCGGGTCTTTATAGCGCCGCGGGCGGTTTGCGTTTCCCGCCGCATCCAGCGCATCCGCATCCGCATTCGCATCCGCACGCCCACCATCCGCTGGGCAGTGCGTATACCACCGCCGAGGACGTGGTCCTCGCATCGGCCGTTGCCCATCAGCTGCATCCGGCGATGCGACcTCTGCGCGCCcTACAGCCCGAGGAC
phenotype8popPE      AGCGTCTCGTCGCTGTTGACGGCGGGTAGCAACAACAACAACAGTATTAACGGTAGCGCAGCAGCAGCAGCGACGGCAGCAGCAGCAGCGGCAGCTCAGGCCTTAAGCTCACCAGATTCTGGAGCTGGCAATTATCGTAGCTCGCCGTCGCAGCTATCGCCACAAAGTAATCACAGCAATaaTAACAACAGTACTAACAACAACAACAACAACAACAATAGCAAAAATCACGAAGCTTTGAGCGTCTCACCCACAACAACAACAACAAATCGAACCACACCAACAACAACACCGCCAACACCACCGCCACAAGCAAGTGGAGCGCCAGCGCCACCACCACCACCGCCGTCGTCGTCGTCGTCATTACCCGCGCATCATTCGCCCAGCGTCGCACCGCCACCGCCACCGCCACCACAGCAGCAGCCGCAACCGCTGCATGCAGCACAGCATTTGGCGCAGCAGCAACAACAGCAAGCACAGCAACCGCCACCGCCGCCATACTTTCCGGCCGCAGCATTAGCTGCTTTGGCTGGCAGTCCGGCGGGACCGCATCATCCGGGTCTTTATAGCGCCGCGGGCGGTTTGCGTTTCCCGCCGCATCCAGGGCATCCGCATCCGCATTCGCATCCGCACGCCCACCATCCGCTGGGCAGTGCGTATACCACCGCCGAGGACGTGGTCCTCGCATCGGCCGTTGCCCATCAGCTGCATCCGGCGATGCGACCTCTGCGCGCCCTTCAGCCCGAGGAC
phenotype8popPE      AGCGTCTCGTCGCTGTTGACGGCGGGTAGCAACAACAACAACAGTATTAACGGTAGCGCAGCAGCAGCAGCGACGGCAGCAGCAGCAGCGGCAGCTCAGGCCTTAAGCTCACCAGATTCTGGAGCTGGCAATTATCGTAGCTCGCCGTCGCAGCTATCGCCACAAAGTAATCACAGCAATaaTAACAACAGTACTAACAACAACAACAACAACAACAATAGCAAAAATCACGAAGCTTTGAGCGTCTCACCCACAACAACAACAACAAATCGAACCACACCAACAACAACACCGCCAACACCACCGCCACAAGCAAGTGGAGCGCCAGCGCCACCACCACCACCGCCGTCGTCGTCGTCGTCATTACCCGCGCATCATTCGCCCAGCGTCGCACCGCCACCGCCACCGCCACCACAGCAGCAGCCGCAACCGCTGCATGCAGCACAGCATTTGGCGCAGCAGCAACAACAGCAAGCACAGCAACCGCCACCGCCGCCATACTTTCCGGCCGCAGCATTAGCTGCTTTGGCTGGCAGTCCGGCGGGACCGCATCATCCGGGTCTTTATAGCGCCGCGGGCGGTTTGCGTTTCCCGCCGCATCCAGGGCATCCGCATCCGCATTCGCATCCGCACGCCCACCATCCGCTGGGCAGTGCGTATACCACCGCCGAGGACGTGGTCCTCGCATCGGCCGTTGCCCATCAGCTGCATCCGGCGATGCGACCTCTGCGCGCCCTTCAGCCCGAGGAC
phenotype8popPE      AGCGTCTCGTCGCTGTTGACGGCGGGTAGCAACAACAACAACAGTATTAACGGTAGCGCAGCAGCAGCAGCGACGGCAGCAGCAGCAGCGGCAGCTCAGGCCTTAAGCTCACCAGATTCTGGAGCTGGCAATTATCGTAGCTCGCCGTCGCAGCTATCGCCACAAAGTAATCACAGCAATaaTAACAACAGTACTAACAACAACAACAACAACAACAATAGCAAAAaTCACGAAGCTTTGAGCGTCTCACCCACAACAACAACAACAAATCGAACCACACCAACAACAACACCGCCAACACCACCGCCACAAGCAAGTGGAGCGCCAGCGCCACCACCACCACCGCCGTCGTCGTCGTCGTCATTACCCGCGCATCATTCACCCAGCGTCGCACCGCCACCGCCACCGCCACCACAGCAGCAGCCGCAACCGCTGCATGCAGCACAGCATTTGGCGCAGCAGCAACAACAGCAAGCACAGCAACCGCCACCGCCGCCATACTTTCCGGCCGCAGCATTAGCTGCTTTGGCTGGCAGTCCGGCGGGACCGCATCATCCGGGTCTTTATAGCGCCGCGGGCGGTTTGCGTTTCCCGCCGCATCCAGGGCATCCGCATCCGCATTCGCATCCGCACGCCCACCATCCGCTGGGCAGTGCGTATACCACCGCCGAGGACGTGGTCCTCGCATCGGCCGTTGCCCATCAGCTGCATCCGGCGATGCGACCTCTGCGCGCCCTTCAGCCCGAGGAC
phenotype8popSR      AGCGTCTCGTCGCTGTTGACGGcGGGTAGCAACAACAACAACAGTATTAACGGTAGCGCAGCAGCAGCAGCGACGGCAGCAGCAGCAGCGGCAGCTCAgGCCTTAAGCTCACCAGATTCTGGAGCTGGCAATTATCGTAGCTCGCCGTCGCAGCTATCGcCACAAAGTAATCACAGCAATaaTAACAACAGTACTAACAACAACAACAACAACAACAATAGCAAAAATCACGAAGCTTTGAGCGTCTCACCCACAACAACAACAACAAATCGAACCACACCAACAACAACACCGCCAACACCACCGCCACAAGCAAGTGGAGCGCCAGCGCCACCACCACCACCGCCGTCGTCGTCGTCGTCATTACCCGCGCATCATTCGCCCAGCGTCGCACCGCCACCGCCACCGCCACCACAGCAGCAGCCGCAACCGCTGCATGCAGCACAGCATTTGGCGCAGCAGCAACAACAGCAAGCACAGCAACCGCCACCGCCGCCATACTTTCCGGCCGCAGCATTAGCTGCTTTGGCTGGCAGTCCGGCGGGACCGCATCATCCGGGTCTTTATAGCGCCGCGGGCGGTTTGCGTTTCCCGCCGCATCCAGGGCATCCGCATCCGCATTCGCATCCGCACGCCCACCATCCGCTGGGCAGTGCGTATACCACCGCCGAgGaCGTGGTCCTCGCATCGGCCGTTGCCCATCAGCTGCATCCGGCGATGCGACCTCTGCGCGCCCTTCAGCCCGAGgAC
phenotype8popSR      AGCGTCTCGTCGCTGTTGACGGCGGGTAGCAACAACAACAACAGTATTAACGGTAGCGCAGCAGCAGCAGCGACGGCAGCAGCAGCAGCGGCAGCTCAGGCCTTAAGCTCACCAGATTCTGGAGCTGGCAATTATCGGAGCTCGCCGTCGCAGCTATCGCCACaAAGTAATCACAGCAATaaTAACAACAGTACTAACAACAACAACAACAACAACAATAGCAAAAATCACGAAGCTTTGAGCGTCTCACCCACAACAACAACAACAAATCGAACCACACCAACAACAACACCGCCAACACCACCGCCACAAGCAAGTGGAGCGCCAGCGCCACCACCACCACCGCCGTCGTCGTCGTCGTCATTACCCGCGCATCATTCGCCCAGCGTCGCACCGCCACCGCCACCGCCACCACAGCAGCAGCCGCAACCGCTGCATGCAGCACAGCATTTGGCGCAGCAGCAACAACAGCAAGCACAGCAACCGCCACCGCCGCCATACTTTCCGGCCGCAGCATTAGCTGCTTTGGCTGGCAGTCCGGCGGGACCGCATCaTCCGGGTCTTTATAGCGCCGCGGGCGGTtTGCGTTTCCCGCCGCATCCAGGGCATCCGCATCCGCATTCGCATCCGCACGCCCACCATCCGCTGGGCAGTGCGTATACCACCGCCGAGGACGTGGTCCTCGCATCGGCCGTTGCCCaTCAGCTGCATCCGGCGATGCGACCTCTGCGCGCCCTTCAGCCCGAGGAC
phenotype9popSR      AGCGTCTCGTCGCTGTTGACGGCGGGTAGCAACAACAACAACAGTATTAACGGTAGCGCAGCAGCAGCAGCGACGGCAGCAGCAGCAGCGGCAGCTCAGGCCTTAAGCTCACCAGATTCTGGAGCTGGCAATTATCGTAGCTCGCCGTCGCAGCTATCGCCACAAAGTaATCACAGCAATaaTAACAACAGTACTAACAACAACAACAACAACAACAATAGCAAAAATCACGAAGCTTTGAGCGTCTCACCCACAACAACAACAACAAATCGAACCACACCAACAACAACACCGCCAACACCACCGCCACAAGCAAGTGGAGCGCCAGCGCCACCACCACCACCGCCGTCGTCGTCGTCGTCATTACCCGCGCATCATTCGCCCAGCGTCGCACCGCCACCGCCACCGCCACCACAGCAGCAGCCGCAACCGCTGCATGCAGCACAGCATTTGGCGCAGCAGCAACAACAGCAAGCACAGCAACCGCCACCGCCGCCATACTTTCCGGCCGCAGCATTAGCTGCTTTGGCTGGCAGTCCGGCGGGACCGCATCATCCGGGTCTTTATAGCGCCGCGGGCGGTTTGCGTTTCCCGCCGCATCCAGGGCATCCGCATCCGCATTCGCATCCGCACGCCCACCATCCGCTGGGCAGTGCGTATACCACCGCCGAGGACGTGGTCCTCGCATCGGCCGTTGCCCATCAGCTGCATCCGGCGATGCGACCTCTGCGCGCCCTTCAGCCCGAGGAC
phenotype3popG       AGCGTCTCGTCGCTGTTGACGGCGGGTAGCAACAACAACAACAGTATTAACGGTAGCGCAGCAGCAGCAGCGACGGCAGCAGCAGCAGCGGCAGCTCAGGCCTTAAGCTCACCAGATTCTGGAGCTGGCAATTATCGTAGCTCGCCGTCGcAgCTaTCGCCACAAAgTAATCACAGCAATaaTAACAACAGTACTAACAACAACAACAACAACAACAATAGCAAAAATCACGAAGCTTTGAGCGTCTCACCCACAACAACAACAACAAATCGAACCACACCAACAACAACACCGCCAACACCACCGCCACAAGCAAGTGGAGCGCCAGCGCCACCACCACCACCGCCGTCGTCGTCGTCGTCATTACCCGCGCATCATTCGCCCAGCGTCGCACCGCCACCGCCACCGCCACCACAGCAGCAGCCGCAACCGCTGCATGCAGcACAgCATTTGGCGCAgCAGCAACAACAGCAAGCACAGCAACCGCCACCGcCGcCATACTtTcCGGCcGCAGCATTAgCTGCTTTGGCTGGCAGTCCGGCGGGACCGCATCATCCGGGTCTTTATAGCGcCGcGGGCGGtTTGCGTTTCCCGCCGCATcCAGGGCATCCGCATCCGCATTCGCATCCGCACGCCCACCATCCGCTGGGCAGTGCGTATACCACCGcCGAgGACGTGGTCCTCGCATCGGCCGTTGCCCATCAGCTGCATCCGGCGATGCGACCTCTGCGCGCCCTTCAGCCCGAGGAC
phenotype7popG       AGCGTCTCGTCGCTGTTGACGGCGGGTAGCAACAACAACAACAGTATTAACGGTAGCGCAGCAGCAGCAGCGACGGCAGCAGCAGCAGCGGCGGCTCAGGCCTTAAGCTCACCAGATTCTGGAGCTGGCAATTATCGTAGCTCGCCGTCGCAGCTaTCGCCACaAAGTAATCACAGCAATaaTAACAACAGTACTAACAACAACAACAACAACAACAATAGCAAAAATCACGAAGCTTTGAGCGTCTCACCCACAACAACAACAACAAATCGAACCACACCAACAACAACACCGCCAACACCACCGCCACAAGCAAGTGGAGCGCCAGCGCCACCACCACCACCGCCGTCGTCGTCGTCGTCATTACCCGCGCATCATTCGCCCAGCGTCGCACCGCCACCGCCACCGCCACCACAGCAGCAGCCGCAACCGCTGCATGCAGCACAGCATTTGGCGCAGCAGCAACAACAGCAAGCACAGCAACCGCCACCGCCGCCATACTTTCCGGCCGCAGCATTAGCTGCTTTGGCTGGCAGTCCGGCGGGACCGCATCATCCGGGTCTTTATAGCGCCGCGGGCGGTTTGCGTTTCCCGCCGCATCCAGGGCATCCGCATCCGCATTCGCATCCGcACGCCCACCATCCGCTGGGCAGTGCGTATACCACCGCCGAGGACGTGGTCCTCGCATCGGCCGTTGCCCATCAGCTGCATCCGGCGATGCGACCTCTGCGCGCCcTTCAGCCCGAGGAC
phenotype7popG       AGCGTCTCGTCGCTGTTGACGGCGGGTAGCAACAACAACAACAGTATTAACGGTAGCGCAGCAGCAGCAGCGACGGCAGCAGCAGCAGCGGCAGCTCAGGCCTTAAGCTCACCAGATTCTGGAGCTGGCAATTATCGTAGCTCGCCGTCGcAgCTATCGCCACAAAGTAATCACAGCAATaaTAACAACAGTACTAACAACAACAACAACAACAACAATAGCAAAAATCACGAAGCTTTGAGCGTCTCACCCACAACAACAACAACAAAtCGAACCACACCAACAACAACACCGCCAACACCACCGCCACAAGCAAGTGGAGCGCCAGCGCCACCACCACCACCGCCGTCGTCGTCGTCGTCATTACCCGCGCATCATTCGCCCAGCGTCGCACCGCCACCGCCACCGCCACCACAGCAGCAGCCGCAACCGCTGCATGCAGCACAGCATTTGGCGCAGCAGCAACAACAGCAAGCACAGCAACCGCCACCGCCGCCATACTTTCCGGCCGCAGCATTAGCTGCTTTGGCTGGCAGTCCGGCGGGACCGCATCATCCGGGTCTTTATAGCGCCGCGGGCGGTTTGCGTTTCCCGCCGCATCCAGGGCATCCGCATCCGCATTCGCATCCGCACGCCCACCATCCGCTGGGCAGTGCGTATACCACCGCCGAgGACGTGGTCCTCGCATCGGCCGTTGCCCATCAGCTGCATCCGGCGATGCGACCTCTGCGCGCCCTTCAGCCcGAgGAC
phenotype9popG       AGCGTCTCGTCGCTGTTGACGGCGGGTAGCAACAACAACAACAGTATTAACGGTAGCGCAGCAGCAGcAGCGACGGCAGCAGCAGCAGCGGCAGCTCAGGCCTTAAGCTCACCAGATtCTGGAGCTGGCAATtATCGTAGCTCGCCGTCGcAGCTATCGCCAcAAAGTAATCACAGCAATaaTAACAACAGTACTAACAACAACAACAACAACAACAATAGCAAAAATCACGAAGCTTTGAGCGTCTCACCCACAACAACAACAACAAATCGAACCACACCAACAACAACACCGCCAACACCACCGCCACAAGCAAGTGGAGCGCCAGCGCCACCACCACCACCGCCGTCGTCGTCGTCGTCATTACCCGCGCATCATTCGCCCAGCGTCGCACCGCCACCGCCACCGCCACCACAGCAGCAGCCGCAACCGCTGCATGCAGCACAGCATTTGGCGCAGCAGCAACAACAGCAAGCACAGCAACCGCCACCGCCGCCATACTTTCCGGCCGCAGCATTAGCTGCTTTGGCTGGCAGTCCGGCGGGACCGCATCATCCGGGTCTTTATAGCGCCGCGGGCGGtTTGCGTTTCCCGCCGCATCCAgGGCATCCGCATCCGCATTCGCATCCGCACGCCCACCATCCGCTGGGCAGTGCGTATACCACCGCCGAGGACGTGGTCCTCGCATCGGCCGTTGCCCATCAGCTGCaTCCGGCGATGCGACcTCTGCGCGCCcTTCAGCCcGAGGAC
phenotype7popTUN     AGCGTCTCGTCGCTGTTGACGGCGGGTAGCAACAACAACAACAGTATTAACGGTAGCGCAGCAGCAGCAGCGACGGCAGCAGCAGCAGCGGCAGCTCAGGCTTTAAGCTCACCAGATTCTGGAGCTGGCAATTATCGTAGCTCGCCGTCGCAGCTATCGCCACaAAGTAATCACAGCAATaaTAACAACAGTACTAACAACAACAACAACAACAACAATAGCAAAAATCACGAAGCTTTGAGCGTCTCACCCACAACAACAACAACAAATCGAACCACACCAACAACAACACCGCCAACACCACCGCCACAAGCAAGTGGAGCGCCAGCGCCACCACCACCACCGCCGTCGTCGTCGTCGTCATTACCCGCGCATCATTCGCCCAGCGTCGCACCGCCACCGCCACCGCCACCACAGCAGCAGCCGCAACCGCTGCATGCAGCACAGCATTTGGCGCAGCAGCAACAACAGCAAGCACAGCAACCGCCACCGCCGCCATACTTTCCGGCCGCAGCATTAGCTGCTTTGGCTGGCAGTCCGGCGGGACCGCATCATCCGGGTCTTTATAGCGCCGCGGGCGGTTTGCGTTTCCCGCCGCATCCAGGGCATCCGCATCCGCATTCGCATCCGCACGCCCACCATCCGCTGGGCAGTGCGTATACCACCGCCGAGGACGTGGTCCTCGCATCGGCCGTTGCCCATCAGCTGCATCCGGCGATGCGACCTCTGCGCGCCCTTCAGCCCGAGGAC
phenotype7popTUN     AGCGTCTCGTCGCTGTTGACGGCGGGTAGCAACAACAACAACAGTATTAACGGTAGCGCAGCAGCAGCAGCGACGGCAGCAGCAGCAGCGGCAGCTCAGGCCTTAAGCTCACCAGATTCTGGAGCTGGCAATTATCGTAGCTCGCCGTCGCAGCTATCGCCACAAAGTAATCACAGCAATaaTAACAACAGTACTAACAACAACAACAACAACAACAATAGCAAAAATCACGAAGCTTTGAGCGTCTCACCCACAACAACAACAACAAATCGAACCACACCAACAACAACACCGCCAACACCACCGCCACAAGCAAGTGGAGCGCCAGCGCCACCACCACCACCGCCGTCGTCGTCGTCGTCATTACCCGCGCATCATTCGCCCAGCGTCGCACCGCCACCGCCACCGCCACCACAGCAGCAGCCGCAACCGCTGCACGCAGCACAGCATTTGGCGCAGCAGCAACAACAGCAAGCACAGCAACCGCCACCGCCGCCATACTTTCCGGCCGCAGCATTAGCTGCTTTGGCTGGCAGTCCGGCGGGACCGCATCATCCGGGTCTTTATAGCGcCGCGGGCGGTTTGCGTTTCCCGCCGCATCCAGGGCATCCGCATCCGCATTCGCATCCGCACGCCCACCATCCGCTGGGCAGTGCGTATACCACCGCCGAGGACGTGGTCCTCGCATCGGCCGTTGCCCATCAGCTGCATCCGGCGATGCGACCTCTGCGCGCCCTTCAGCCCGAGGAc
phenotype5popPED     AGCGTCTCGTCGCTGTTGACGGCGGGTAGCAACAACAACAACAGTATTAACGGTAGCGCAGCAGCAGCAGCGACGGCAGCAGCAGCAGCGGCAGCTCAGGCCTTAAGCTCACCAGATTCTGGAGCTGGCAATTATCGTAGCTCGCCGTCGCAGcTATCGCCACAAAgTAATCACAGCAATaaTAACAACAGTACTAACAACAACAACAACAACAACAATAGCAAAAATCACGAAGCTTTGAGCGTCTCACCCACAACAACAACAACAAATCGAACCACACCAACAACAACACCGCCAACACCACCGCCACAAGCAAGTGGAGCGCCAGCGCCACCACCACCACCGCCGTCGTCGTCGTCGTCATTACCCGCGCATCATTCGCCCAGCGTCGCACCGCCACCGCCACCGCCACCACAGCAGCAGCCGCAACCGCTGCATGCAGCACAGCATTTGGCTCAGCAGCAACAACAGCAAGCACAGCAACCGCCACCGCCGCCATACTTTCCGGCCGCAGCATTAGCTGCTTTGGCTGGCAGTCCGGCGGGACCGCATCATCCGGGTCTTTATAGCGCCGCGGGCGGTTTGCGTTTCCCGCCGCATCCAGGGCATCCGCATCCGCATTCGCATCCGCACGCCCACCATCCGCTGGGCAGTGCGTATACCACCGCCGAGGACGTGGTCCTCGCATCGGCCGTTGCCCATCAGCTGCATCCGGCGATGCGACCTCTGCGCGCCCTTCAGCCCGAGGAC
phenotype8popLAG     AGCGTCTCGTCGCTGTTGACGGCGGGTAGCAACAACAACAACAGTATTAACGGTAGCGCAGCAGCAGCAGCGACGGCAGCAGCAGCAGCGGCAGCTCAGGCCTTAAGCTCACCAGATTCTGGAGCTGGCAATTATCGTAGCTCGCCGTCGCAGCTATCGCcaCAAaGTAATCACAGCAATaaTAACAACAGTACTAACAACAACAACAACAACAACAATAGCAAAAATCACGAAGCTTTGAGCGTCTCACCCACAACAACAACAACAAATCGAACCACACCAACAACAACACCGCCAACACCACCGCCACAAGCAAGTGGAGCGCCAGCGCCACCACCACCACCGCCGTCGTCGTCGTCGTCATTACCCGCGCATCATTCGCCCAGCGTCGCACCGCCACCGCCACCGCCACCACAGCAGCAGCCGCAACCGCTGCATGCAGCACAGCATTTGGCGCAGCAGCAACAACAGCAAGCACAGCAACCGCCACCGCCGCCATACTTTCCGGCCGCAGCATTAGCTGCTTTGGCTGGCAgTCCGGCGGGACCGCATCATCCGGGTCTTTATAGCGCCGCGGGCGGTTTGCGTTTCCCGCCGCATCcAGGGCATCCGCATCCGCATTCGCATCCGCACGCCCACCATCCGCTGGGCAGTGCGTATACCACCGCCGAGGACGTGGTCCTCGCATCGGCCGTTGCCCATCAGCTGCATCCGGCGATGCGACCTCTGCGCGCCCTTCAGCCCGAGGAC
phenotype5popPOM     AGCGTCTCGTCGCTGTTGACGGcGGGTAGCAACAACAACAACAGTATTAACGGTAGCGCAGCAGCAGCAGCGACGGCAGCAGCAGCAGCGGCAGCTCAGGCCTTAAGCTCACCAGATTCTGGAGCTGGCAATTATCGTAGCTCGCCGTCGCAgCTaTCGCCACaAAGTAaTCACAGCAATaaTAACAACAGTACTAACAACAACAACAACAACAACAATAGCAAAAATCACGAAGCTTTGAGCGTCTCACCCACAACAACAACAACAAATCGAACCACACCAACAACAACACCGCCAACACCACCGCCACAAGCAAGTGGAGCGCCAGCGCCACCACCACCACCGCCGTCGTCGTCGTCGTCATTACCCGCGCATCATTCGCCCAGCGTCGCACCGCCACCGCCACCGCCAcCACAGCAGCAGCCGCAACCGCTGCATGCAGCACAGCATTTGGCGCAGCAGCAACAACAGCAAGCACAGCAACCGCCACCGCCGCCATACTTTCCGGCCGCAGCATTAGCTGCTTTGGCTGGCAGTCCGGCGGGACCGCATCATCCGGGTCTTTATAGCGCCGCGGGCGGTTTGCGTTTCCCGCCGCATCCAGGGCATCCGCATCCGCATTCGCATCCGCACGCCCACCATCCGCTGGGCAGTGCGTATACCACCGCCGAGGACGTGGTCCTCGCATCGGCCGTTGCCCATCAGCTGCATCCGGCGATGCGACCTCTGCGCGCCCTTCAGCCCGAGGAC
phenotype5popPOM     AGCGTCTCGTCGCTGTTGACGGCGGGTAGCAACAACAACAACAGTATTAACGGTAGCGCAGCAGCAGCAGCGACGGCAGCAGCAGCAGCGGCAGCTCAGGCCTTAAGCTCACCAGATTCTGGAGCTGGCAATTATCGTAGCTCGCCGTCGCAGCTaTCGCCACaAAgTAATCACAGCAATaaTAACAACAGTACTAACAACAACAACAACAACAACAATAGCAAAAATCACGAAGCTTTGAGCGTCTCACCCACAACAACAACAACAAATCGAACCACACCAACAACAACACCGCCAACACCACCGCCACAAGCAAGTGGAGCGCCAGCGCCACCACCACCACCGCCGTCGTCGTCGTCGTCATTACCCGCGCATCATTCGCCCAGCGTCGCACCGCCACCGCCACCGCCACCACAGCAGCAGCCGCAACCGCTGCATGCAGCACAGCATTTGGCGCAGCAGCAACAACAGCAAGCACAGCAACCGCCACCGCCGCCATACTTTCCGGCCGCAGCATTAGCTGCTTTGGCTGGCAGTCCGGCGGGACCGCATCATCCGGGTCTTTATAGCGCCGCGGGCGGTTTGCGTTTCCCGCCGCATCCAGGGCATCCGCATCCGCATTCGCATCCGCACGCCCACCATCCGCTGGGCAGTGCGTATACCACCGCCGAGGACGTGGTCCTCGCATCGGCCGTTGCCCATCAGCTGCATCCGGCGATGCGACCTCTGCGCGCCCTTCAGCCCGAGGAC
phenotype8popU       AGCGTCTCGTCGCTGTTGACGGCGGGTAGCAACAACAACAACAGTATTAACGGTAGCGCAGCAGCAGCAGCGACGGCAGCAGCAGCAGCGGCAGCTCAGGCCTTAAGCTCACCAGATTCTGGAGCTGGCAATTATCGTAGCTCGCCGTCGCAGCTATCGCCACaAAGTAATCACAGCAATaaTAACAACAGTACTAACAACAACAACAACAACAACAATAGCAAAAATCACGAAGCTTTGAGCGTCTCACCCACAACAACAACAACAAATCgAACCACACCAACAACAACACCGCCAACACCACCGCCACAAGCAAGTGGAGCGCCAGCGCCACCACCACCACCGCCGTCGTCGTCGTCGTCATTACCCGCGCATCATTCGCCCAGCGTCGCACCGCCACCGCCACCGCCACCACAGCAGCAGCCGCAACCGCTGCATGCAGCACAGCATTTGGCGCAGCAGCAACAACAGCAAGCACAGCAACCGCCACCGCCGCCATACTTTCCGGCCGCAGCATTAGCTGCTTTGGCTGGCAGTCCGGCGGGACCGCATCATCCGGGTCTTTATAGCGCCGCGGGCGGTTTGCGTTTCCCGCCGCATCCAGGGCATCCGCATCCGCATTCGCATCCGCACGCCCACCATCCGCTGGGCAGTGCGTATACCACCGCCGAGGACGTGGTCCTCGCATCGGCCGTTGCCCATCAGCTGCATCCGGCGATGCGACCTCTGCGCGCCCTTCAGCCCGAGGAC
phenotype7popU       AGCGTCTCGTCGCTGTTGACGGcGGGTAGCAACAACAACAACAGTACTAACGGTAGCCCAGCAGCAGCAGCGACGGCAGCAGCAGCAGCGGCGGCTCAGGCCTTAAGCTCACCAGATTCTGGAGCTGGCAATTATCGTAGCTCGCCGTCGCAGCTaTCGCCACAAAGTAATCACAGCAATaaTAACAACAGTACTAACAACAACAACAACAACAACAATAGCAAAAATCACGAAGCTTTGAGCGCCTCACCCACAACAACAACAACAAATCGAACCACACCAACAACAACACCGCCAACACCACCGCCACAAGCAAGTGGAGCGCCAGCGCCACCACCACCACCGCCGTCGTCGTCGTCGTCATTACCCGCGCATCATTCGCCCAGCGTCGCACCGCCACCGCCACCGCCACCACAGCAGCAGCCGCAACCGCTGCATGCAGCACAGCATTTGGCGCAGCAGCAACAACAGCAATCACAGCAACCGCCACCGCCGCCATACTTTCCGGCTGCAGCATTAGCTGCTTTGGCTGGCAGTCCGGCGGGACCGCATCATCCGGGTCTTTATAGCGCCGCGGGCGGTTTGCGTTTCCCGCCGCATCCAGCGCATCCGCATCCGCATTCGCATCCGCACGCCCACCATCCGCTGGGCAGTGCGTATACCACCGCCGAGGACGTGGTCCTCGCATCGGCCGTTGCCCATCAGCTGCATCCGGCGATGCGACCTCTGCGCGCCCTACAGCCCGAGGAC
phenotype7popUFRGS   AGCGTCTCGTCGCTGTTGACGGCGGGTAGCAACAACAACAACAGTATTAACGGTAGCGCAGCAGCAGCAGCGACGGCAGCAGCAGCAGCGGCAGCTCAGGCCTTAAGCTCACCAGATTCTGGAGCTGGCAATTATCGTAGCTCGCCGTCGCAGCTATCGCCACAAAGTAATCACAGCAATaaTAACAACAGTACTAACAACAACAACAACAACAACAATAGCAAAAATCACGAAGCTTTGAGCGTCTCACCCACAACAACAACAACAAATCGAACCACACCAACAACAACACCGCCAACACCACCGCCACAAGCAAGTGGAGCGCCAGCGCCACCACCACCACCGCCGTCGTCGTCGTCGTCATTACCCGCGCATCATTCGCCCAGCGTCGCACCGCCACCGCCACCGCCACCACAGCAGCAGCCGCAACCGCTGCATGCAGCACAGCATTTGGCGCAGCAGCAACAACAGCAAGCACAGCAACCGCCACCGCCGCCATACTTTCCGGCCGCAGCATTAGCTGCTTTGGCTGGCAGTCCGGCGGGACCGCATCATCCGGGTCTTTATAGCGCCGCGGGCGGTTTGCGTTTCCCGCCGCATCCAGGGCATCCGCATCCGCATTCGCATCCGCACGCCCACCATCCGCTGGGCAGTGCGTATACCACCGCCGAGGACGTGGTCCTCGCATCGGCCGTTGCCCATCAGCTGCATCCGGCGATGCGACCTCTGCGCGCCCtTCAGCCCGAGGAC
phenotype8popUFRGS   AGCGTCTCGTCGCTGTTGACGGCGGGTAGCAACAACAACAACAGTATTAACGGTAGCGCAGCAGCAGCAGCGACGGCAGCAGCAGCAGCGGCAGCTCAGGCCTTAAGCTCACCAGATTCTGGAGCTGGCAATTATCGTAGCTCGCCGTCGCAGCTATCGCCACaAAGTAATCACAGCAaTaaTAACAACAGTACTAACAACAACAACAACAACAACAATAGCAAAAATCACGAAGCTTTGAGCGTCTCACCCACAACAACAACAACAAATCGAACCACACCAACAACAACACCGCCAACACCACCGCCACAAGCAAGTGGAGCGCCAGCGCCACCACCACCACCGCCGTCGTCGTCGTCGTCATTACCCGCGCATCATTCGCCCAGCGTCGCACCGCCACCGCCACCGCCACCACAGCAGCAGCCGCAACCGCTGCATGCAGCACAGCATTTGGCGCAGCAGCAACAACAGCAAGCACAGCAACCGCCACCGCCGCCATACTTTCCGGCCGCAGCATTAGCTGCTTTGGCTGGCAGTCCGGCGGGACCGCATCATCCGGGTCTTTATAGCGCCGCGGGCGGTTTGCGTTTCCCGCCGCATCCAGGGCATCCGCATCCGCATTCGCATCCGCACGCCCACCATCCGCTGGGCAGTGCGTATACCACCGCCGAGGACGTGGTCCTCGCATCGGCCGTTGCCcATCAGCTGCATCCGGCGATGCGACCTCTGCGCGCCCTTCAGCCCGAGGAC
phenotype9popUFRGS   AGCGTCTCGTCGCTGTTGACGGCGGGTAGCAACAACAACAACAGTACTAACGGTAGCCCAGCAGCAGCAGCGACGGCAGCAGCAGCAGCGGCGGCTCAGGCCTTAAGCTCACCAGATTCTGGAGCTGGCAATTATCGTAGCTCGCCGTCGCAGCTATCGCCACAAAGTAATCACAGCAATaaTAACAACAGTACTAACAACAACAACAACAACAACAATAGCAAAAATCACGAAGCTTTGAGCGCCtCACCCACAACAACAACAACAAATCGAACCACACCAACAACAACACCGCCAACACCACCGCCACAAGCAAGTGGAGCGCCAGCGCCACCACCACCACCGCCGTCGTCGTCGTCGTCATTACCCGCGCATCATTCGCCCAGCGTCGCACCGCCACCGCCACCGCCACCACAGCAGCAGCCGCAACCGCTGCATGCAGCACAGCATTTGGCGCAGCAGCAACAACAGCAATCACAGCAACCGCCACCGCCGCcATACTTTCCGGCTGCAGCATTAGCTGCTTTGGCTGGCAGTCCGGCGGGACCGCATCATCCGGGTCTTTATAGCGCCGCGGGCGGTTTGCGTtTCCCGCCGCATCCAGCGCATCCGCATCCGCATTCGCATCCGCACGCCCACCATCCGCTGGGCAGTGCGTATACCACCGCCGAGGACGTGGTCCTCGCATCGGCCgTTGCCCATCAGCTGCATCCGGCGATGCGACCTCTGCGCGCCCTACAGCCCGAGGAC
phenotype9popUFRGS   AGCGTCTCGTCGCTGTTGACGGCGGGTAGCAACAACAACAACAGTATTAACGGTAGCGCAGCAgCAGCAGCGACGGCAGCAGCAGCAGCGGCAGCTCAGGCCTTAAGCTCACCAGATTCTGGAGCTGGCAATTATCGTAGCTCGCCGTCGCAGCTATCGCCACAAaGTAATCACAGCAATaaTAACAACAGTACTAACAACAACAACAACAACAACAATAGCAAAAATCACGAAGCTTTGAGCGTCTCACCCACAACAACAACAACAAATCGAACCACACCAACAACAACACCgCCAACACCACCGCCACAAGCAAGTGGAGCGCCAGCGCCACCACCACCACCGCCGTCGTCGTCGTCGTCATTACCCGCGCATCATTCGCCCAGCGTCGCACCGCCACCGCCACCGCCACCACAGCAGCAGCCGCAACCGCTGCATGCAGCACAGCATTTGGCGCAGCAGCAACAACAGCAAGCACAGCAACCGCCACCGcCGCCATACTTTCCGGCCGCAGCATTAGCTGCTTTGGCTGGCAGTCCGGCGGGACCGCATCATCCGGGTCTTTATAGCGCCGCGGGCGGTTTGCGTTTCCCGCCGCATCCAGGGCATCCGCATCCGCATTCGCATCCGCACGCCCACCATCCGCTGGGCAGTGCGTATACCACCGCCGAGGACGTGGTCCTCGCATCGGCCGTTGCCCATCAGCTGCATCCGGCGATGCGACCTCTGCGCGCCCTTCAGCCCGAGGAC
phenotype9popUFRGS   AGCGTCTCGTCGCTGTTGACGGCGGGTAGCAACAACAACAACAGTATTAACGGTAGCGCAGCAgCAGCAGCGACGGCAGCAGCAGCAGCGGCAGCTCAGGCCTTAAGCTCACCAGATTCTGGAGCTGGCAATTATCGTAGCTCGCCGTCGCAGCTATCGCCACAAaGTAATCACAGCAATaaTAACAACAGTACTAACAACAACAACAACAACAACAATAGCAAAAATCACGAAGCTTTGAGCGTCTCACCCACAACAACAACAACAAATCGAACCACACCAACAACAACACCgCCAACACCACCGCCACAAGCAAGTGGAGCGCCAGCGCCACCACCACCACCGCCGTCGTCGTCGTCGTCATTACCCGCGCATCATTCGCCCAGCGTCGCACCGCCACCGCCACCGCCACCACAGCAGCAGCCGCAACCGCTGCATGCAGCACAGCATTTGGCGCAGCAGCAACAACAGCAAGCACAGCAACCGCCACCGcCGCCATACTTTCCGGCCGCAGCATTAGCTGCTTTGGCTGGCAGTCCGGCGGGACCGCATCATCCGGGTCTTTATAGCGCCGCGGGCGGTTTGCGTTTCCCGCCGCATCCAGGGCATCCGCATCCGCATTCGCATCCGCACGCCCACCATCCGCTGGGCAGTGCGTATACCACCGCCGAGGACGTGGTCCTCGCATCGGCCGTTGCCCATCAGCTGCATCCGGCGATGCGACCTCTGCGCGCCCTTCAGCCCGAGGAC
phenotype8popUSPR    AGCGTCTCGTCGCTGTTGACGGCGGGTAGCAACAACAACAACAGTATTAACGGTAGCGCAGCAGCAGCAGCGACGGCAGCAGCAGCAGCGGCAGCTCAGGCCTTAAGCTCACCAGATTCTGGAGCTGGCAATTATCGTAGCTCGCCGTCGCAGCTaTCGCCACaAAGTAATCACAGCAATaaTAACAACAGTACTAACAACAACAACAACAACAACAATAGCAAAAATCACGAAGCTTTGAGCGTCTCACCCACAACAACAACAACAAATCGAACCACACCAACAACAACACCGCCAACACCACCGCCACAAGCAAGTGGAGCGCCAGCGCCACCaCCACCACCGCCGTCGTCGTCGTCGTCATTACCCGCGCATCATTCGCCCAGCGTCGCACCGCCACCGCCACCGCCACCACAGCAGCAGCCGCAACCGCTGCATGCAGCACAGCATTTGGCGCAGCAGCAACAACAGCAAGCACAGCAACCGCCACCGCCGCCATACTTTCCGGCCGCAGCATTAGCTGCTTTGGCTGGCAGTCCGGCGGGACCGCATCATCCGGGTCTTTATAGCGCCGCGGGCGGTTTGCGTTTCCCGCCGCATCCAGGGCATCCGCATCCGCATTCGCATCCGCACGCCCACCATCCGCTGGGCAGTGCGTATACCACCGCCGAGGACGTGGTCCTCGCATCGGCCGTTGCCCATCAGCTGCATCCGGCGATGCGACCTCTGCGCGCCCTTCAGCCCGAgGAC
phenotype8popUSPR    AGCGTCTCGTCGCTGTTGACgGCGGGTAGCAACAACAACAACAGTATTAACGGTAGCGCAGCAGCAGCAGCGACGGCAGCAGCAGCAGCGGCAGCTCAGGCCTTAAGCTCACCAGATTCTGGAGCTGGCAATTATCGTAGCTCGCCGTCGCAGCTATCGCCACAAAGTAATCACAGCAATaaTAACAACAGTACTAACAACAACAACAACAACAACAATAGCAAAAATCACGAAGCTTTGAGCGTCTCACCCACAACAACAACAACAAATCGAACCACACCAACAACAACACCGCCAACACCACCGCCACAAGCAAGTGGAGCGCCAGCGCCACCACCACCACCGCCGTCGTCGTCGTCGTCATTACCCGCGCATCATTCGCCCAGCGTCGCACCGCCACCGCCACCGCCACCACAGCAGCAGCCGCAACCGCTGCATGCAGCACAGCATTTGGCGCAGCAGCAACAACAGCAAGCACAGCAACCGCCACCGCCGCCATACTTTCCGGCCGCAGCATTAGCTGCTTTGGCTGGCAGTCCGGCGGGACCGCATCATCCGGGTCTTTATAGCGCCGCGGGCGGTTTGCGTTTCCCGCCGCATCCAGGGCATCCGCATCCGCATTCGCATCCGCACGCCCACCATCCGCTGGGCAGTGCGTATACCACCGCCGAGGACGTGGTCCTCGCATCGGCCGTTGCCCATCAGCTGCATCCGGCGATGCGACCTctGCGCGCcCTTCAGCCCGAGgAC
phenotype8popUSPR    AGCGTCTCGTCGCTGTTGACGGCGGGTAGCAACAACAACAACAGTACTAACGGTAGCCCAGCAGCAGCAGCGACGGCAGCAGCAGCAGCGGCGGCTCAGGCCTTAAGCTCACCAGATTCTGGAGCTGGCAATTATCGTAGCTCGCCGTCGCAGCTATCGCCACAAaGTaATCACAGCAATaaTAACAACAGTACTAACAACAACAACAACAACAACAATAGCAAAAATCACGAAGCTTTGAGCGCCTCACCCACAACAACAACAACAAATCGAACCACACCAACAACAACACCGCCAACACCACCGCCACAAGCAAGTGGAGCGCCAGCGCCACCACCACCACCGCCGTCGTCGTCGTCGTCATTACCCGCGCATCATTCGCCCAGCGTCGCACCGCCACCGCCACCGCCACCACAGCAGCAGCCGCAACCGCTGCATGCAGCACAGCATTTGGCGCAGCAGCAACAACAGCAATCACAGCAACCGCCACCGCCGCCATACTTTCCGGCTGCAGCATTAGCTGCTTTGGCTGGCAGTCCGGCGGGACCGCATCATCCGGGTCTTTATAGCGCCGCGGGCGGTTTGCGTTTCCCGCCGCATCCAGCACATCCGCATCCGCATTCGCATCCGCACGCCCACCATCCGCTGGGCAGTGCGTATACCACCGCCGAGGACGTGGTCCTCGCATCGGCCGTTGCCCATCAGCTGCATCCGGCGATGCGACCTCTGCGCGCCcTACAGCCCGAGgAC
phenotype8popCEB     AGCGTCTCGTCGCTGTTGACGGCGGGTAGCAACAACAACAACAGTATTAACGGTAGCGCAGCAGCAGCAGCGACGGCAGCAGCAGCAGCGGCAGCTCAGGCCTTAAGCTCACCAGATTCTGGAGCTGGCAATTATCGTAGCTCGCCGTCGCAGCTATCGCCACAAAGTAATCACAGCAATaaTAACAACAGTACTAACAACAACAACAACAACAACAATAGCAAAAATCACGAAGCTTTGAGCGTCTCACCCACAACAACAACAACAAATCGAACCACACCAACAACAACACCGCCAACACCACCGCCACAAGcAAGTGGAGCGCCAGCGCCACCACCACCACCGcCGTCGTCGTCGTCGTCATTACCCGCGCATCATTCGCCCAGCGTCGCACCGCCACCGCCACCGCCACCACAGCAGCAGCCGCAACCGCTGCATGCAGCACAGCATTTGGCGCAGCAGCAACAACAGCAAGCACAGCAACCGCCACCGCCGCCATACTTTCCGGCCGCAGCATTAGCTGCTTTGGCTGGCAGTCCGGCGGGACCGCATCATCCGGGTCTTTATAGCGCCGCGGGCGGTTTGCGTTTCCCGCCGCATCCAGGGCATCCGCATCCGCATTCGCATCCGCACGCCCACCATCCGCTGGGCAGTGCGTATACCACCGCCGAGGACGTGGTCCTCGCATCGGCCGTTGCCCATCAGCTGCATCCGGCGATGCGACCTCTGCGCGCCCTTCAGCCCGAGGAC
phenotype9popCEB     AGCGTCTCGTCGCTGTTGACGGCGGGTAGCAACAACAACAACAGTATTAACGGTAGCGCAGCAGCAgCAGCGACGGCAGCAGCAGCAGCGGCAGcTCAgGCCTTAAGCTCACCAGATTCTGGAGCTGGCAATtATCGTAgCTCGCCGTCGCAGCTATCGCCACAAAGTAATCACAGCAATaaTAACAACAGTACTAACAACAACAACAACAACAACAATAGCAAAAATCACGAAGCTTTGAGCGTCTCACCCACAACAACAACAACAAATCGAACCACACCAACAACAACACCGCCAACACCACCGCCACAAgCAAGTGGAGCGCCAGCGCCACCACCACCACCGCCGTCGTCGTCGTCGTCATTACCCGCGCATCATTCGGCCAGCGTCGCACCGCCACCGCCACCGCCACCACAGCAGCAGCCGCAACCGCTGCATGCAGCACAGCATTTGGCGCAGCAGCAACAACAGCAAGCACAGCAACCGCCACCGCCGCCATACTTTCCGGCCGCAGCATTAGCTGCTTTGGCTGGCAGTCCGGCGGGACCGCATCATCCGGGTCTTTATAGCGCCGCGGGCGGTTTGCGTTTCCCGCCGCATCCAGGGCATCCGCATCCGCATTCGCATCCGCACGCCCACCATCCGCTGGGCAGTGCGTATACCACCGCCGAGGACGTGGTCCTCGCATCGGCCGTTGCCCATCAGCTGCATCCGGCGATGCGACCTCTGCGCGCCCTTCAGCCCGAGGAC
phenotype7popCEB     AGCGTCTCGTCGCTGTTGACGGCGGGTAGCAACAACAACAACAGTATTAACGGTAGCGCAGCAGCAGCAGCGACGGCAGCAGCAGCAGCGGCAGCTCAGGCCTTAAGCTCACCAGATTCTGGAGCTGGCAATTATCGTAGCTCGCCGTCGCAGCTATCGCCACAAAGTAATCACAGCAATaaTAACAACAGTACTAACAACAACAACAACAACAACAATAGCAAAAATCACGAAGCTTTGAGCGTCTCACCCACAACAACAACAACAAATCGAACCACACCAACAACAACACCGCCAACACCACCGCCACAAGCAAGTGGAGCGCCAGCGCCACCACCACCACCGCCGTCGTCGTCGTCGTCATTACCCGCGCATCATTCGCCCAGCGTCGCACCGCCACCGCCACCGCCACCACAGCAGCAGCCGCAACCGCTGCATGCAGCACAGCATTTGGCGCAGCAGCAACAACAGCAAGCACAGCAACCGCCACCGCCGCCATACTTTCCGGCCGCAGCATTAGCTGCTTTGGCTGGCAGTCCGGCGGGACCGCATCATCCGGGTCTTTATAGCGCCGCGGGCGGTTTGCGTTTCCCGCCGCATCcAGGGCATCCGCATCCGCATTCGCATCCGCACGCCCACCATCCGCTGGGCAGTGCGTATACCACCGCCGAGGACGTGGTCCTCGCATCGGCCGTTGCCCATCAGCTGCATCCGGCGATGCGACCTCTGCGCGCCCTTCAGCCCGAGGAC
phenotype7popCEB     AGCGTCTCGTCGCTGTTGACGGCGGGTAGCAACAACAACAACAGTATTAACGGTAGCGCAGCAGCAGCAGCGACGGCAGCAGCAGCAGCGGCAGCTCAGGCCTTAAGCTCACCAGATTCTGGAGCTGGCAATTATCGTAGCTCGCCGTCGCAGcTATCGCCACAAaGTAATCACAGCAAtaaTAACAACAGTACTAACAACAACAACAACAACAACAATAGCAAAAATCACGAAGCTTTGAGCGTCTCACCCACAACAACAACAACAAATCGAACCACACCAACAACAACACCGCCAACACCACCGCCACAAGCAAGTGGAGCGCCAGCGCCACCACCACCACCGCCGTCGTCGTCGTCGTCATTACCCGCTCATCATTCGCCCAGCGTCGCACCGCCACCGCCACCGCCACCACAGCAGCAGCCGCAACCGCTGCATGCAGCACAGCATTTGGCGCAGCAGCAACAACAGCAAGCACAGCAACCGCCACCGCCGCCATACTTTCCGGCCGCAGCATTAGCTGCTTTGGCTGGCAGTCCGGCGGGACCGCATCATCCGGGTCTTTATAGCGCCGCGGGCGGTTTGCGTTTCCCGCCGCATCCAGGGCATCCGCATCCGCATTCGCATCCGCACGCCCACCATCCGCTGGGCAGTGCGTATACCACCGCCGAGGACGTGGTCCTCGCATCGGCCGTTGCCCATCAGCTGCATCCGGCGATGCGACCTCTGCGCGCCCTTCAGCCCGAGGAC
phenotype7popCC      AGCGTCTCGTCGCTGTTGACGGCGGGTAGCAACAACAACAACAGTATTAACGGTAGCGCAGCAGCAGCAGCGACGGCAGCAGCAGCAGCGGCAGCTCAgGCCTTAAGCTCACCAGATTCTGGAGCTGGCAATTATCGTAGCTCGCCGTCGCAGCTATCGCCACAAAGTAATCACAGCAATaaTAACAACAGTACTAACAACAACAACAACAACAACAATAGCAAAAATCACGAAGCTTTGAGCGTCTCACCCACAACAACAACAACAAATCGAACCACACCAACAACAACACCGCCAACACCACCGCCACAAGCAAGTGGAGCGCCAGCGCCACCACCACCACCGCCGTCGTCGTCGTCGTCATTACCCGCGCATCATTCGCCCAGCGTCGCACCGCCACCGCCACCGCCACCACAGCAGCAGCCGCAACCGCTGCATGCAGCACAGCATTTGGCGCAGCAGCAACAACAGCAAGCACAGCAACCGCCACCGCCGCCATACTTTCCGGCCGCAGCATTAGCTGCTTTGGCTGGCAGTCCGGCGGGACCGCATCATCCGGGTCTTTATAGCGCCGCGGGCGGTTTGCGTTTCCCGCCGCATCCAGGGCATCCGCATCCGCATTCGCATCCGCACGCCCACCATCCGCTGGGCAGTGCGTATACCACCGCCGAGGACGTGGTCCTCGCATCGGCCGTTGCCCATCAGCTGCATCCGGCGATGCGACCTCTGCGCGCCCTTCAGCCCGAGGAC
phenotype7popCC      AGCGTCTCGTCGCTGTTGACGGCGGGTAGCAACAACAACAACAGTATTAACGGTAGCGCAGCAGCAGCAGCGACGGCAGCAGCAGCAGCGGCAGCTCAGGCCTTAAGCTCACCAGATTCTGGAGCTGGCAATTATCGTAGCTCGCCGTCGCAGCTATCGCCACAAAGTAATCACAGCAATaaTAACAACAGTACTAACAACAACAACAACAACAACAATAGCAAAAATCACGAAGCTTTGAGCGTCTCACCCACAACAACAACAACAAATCGAACCACACCAACAACAACACCGCCAACACCACCGCCACAAGCAAGTGGAGCGCCAGCGCCACCACCACCACCGCCGTCGTCGTCGTCGTCATTACCCGCGCATCATTCGCCCAGCGTCGCACCGCCACCGCCACCGCCACCACAGCAGCAGCCGCAACCGCTGCATGCAGCACAGCATTTGGCGCAGCAGCAACAACAGCAAGCACAGCAACCGCCACCGCCGCCATACTTTCCGGCCGCAGCATTAGCTGCTTTGGCTGGCAGTCCGGCGGGACCGCATCATCCGGGTCTTTATAGCGCCGCGGGCGGTTTGCGTTTCCCGCCGCATCCAGGGCATCCGCATCCGCATTCGCATCCGCACGCCCACCATCCGCTGGGCAGTGCGTATACCACCGCCGAGGACGTGGTCCTCGCATCGGCCGTTGCCCATCAGCTGCATCCGGCGATGCGACCTCTGCGCGCCCTTCAGCCCGAGGAC
phenotype8popCC      AGCGTCTCGTCGCtGTTGACGGCGGGTAGCAACAACAACAACAGTATTAACGGtAGCGCAGCAGCAGCAGCGACGGCAGCAGCAGCAGCGGCAGCTCAGGCCTTAAGCTCACCAGATTCTGGAGCTGGCAATTATCGTAGCTCGCCGTCGCAGCTATCGCCACAAAGTAATCACAGCAATaaTAACAACAGTACTAACAACAACAACAACAACAACAATAGCAAAAATcACGAAGCTTTGAGCGTCTCACCCACAACAACAACAACAAATCGAACCACACCAACAACAACACCGCCAACACCACCGCCACAAGCAAGTGGAGCGCCAGCGCCACCACCACCACCGCCGTCGTCGTCGTcGTCATTACCCGCGCATCATTCGCCCAGCGTCGCACCGCCACCGCCACCGCCACCACAGCAGCAGCCGCAACCGCTGCATGCAGCACAGCATTTGGCGCAGCAGCAACAACAGCAAGCACAGCAACCGCCACCGCCGCCATACTTTCCGGCCGCAGCATTAGCTGCTTTGGCTGGCAGTCCgGCGGGACCGCATCATCCGGGTCTTTATAGCGCCGCGGGCGGTTTGCGTTTCCCGCCGCATCCAGGgCATCCGCATCCGCATTCGCATCCGCACGCCCACCATCCGCTGGGCAGTGCGTATACCACCGCCGAGGACGTGGTCCTCGCATCGGCCGTTGCCCATCAGCTGCATCCGGCGATGCGACCTCTGCGCGCCCTTCAGCCCGAGGAC
phenotype8popCC      AGCGTCTCGTCGCTGTTGACGGCGGGTAGCAACAACAACAACAGTATTAACGGTAGCGCAGCAGCAGCAGCGACGGCAGCAGCAGCAGCGGCAGCTCAGGCCTTAAGCTCACCAGATTCTGGAGCTGGCAATTATCGTAGCTCGCCGTCGCAGCTATCGCCACAAAGTAATCACAGCAATaaTAACAACAGTACTAACAACAACAACAACAACAACAATAGCAAAAATCACGAAGCTTTGAGCGTCTCACCCACAACAACAACAACAAATCGAACCACACCAACAACAACACCGCCAACACCACCGCCACAAGCAAGTGGAGCGCCAGCGCCACCACCACCACCGCCGTCGTCGTCGTCGTCATTACCCGCGCATCATTCGCCCAGCGTCGCACCGCCACCGCCACCGCCACCACAGCAGCAGCCGCAACCGCTGCATGCAGCACAGCATTTGGCGCAGCAGCAACAACAGCAAGCACAGCAACCGCCACCGCCGCCATACTTTCCGGCCGCAGCATTAGCTGCTTTGGCTGGCAGTCCGGCGGGACCGCATCATCCGGGTCTTTATAGCGCCGCGGGCGGTTTGCGTTTCCCGCCGCATCCAGGGCATCCGCATCCGCATTCGCATCCGCACGCCCACCATCCGCTGGGCAGTGCGTATACCACCGCCGAGGACGTGGTCCTCGCATCGGCCGTTGCCCATCAGCTGCATCCGGCGATGCGACCTCTGCGCGCCCTTCAGCCCGAGGAC
phenotype8popCC      AGCGTCTCGTCGCTGTTGACGGCGGGTAGCAACAACAACAACAGTATTAACGGTAGCGCAGCAGCAGCAGCGACGGCAGCAGCAGCAGCGGCAGCTCAGGCCTTAAGCTCACCAGATTCTGGAGCTGGCAATTATCGTAGCTCGCCGTCGCAGCTATCGCCACAAAGTAATCACAGCAATaaTAACAACAGTACTAACAACAACAACAACAACAACAAtAGCAAAAATCACGAAGCTTTGAGCGTCTCACCCACAACAACAACAACAAATCGAACCACACCAACAACAACACCGCCAACACCACCGCCACAAGCAAGTGGAGCGCCAGCGCCACCACCACCACCGCCGTCGTCGTCGTCGTCATTACCCGCGCATCATTCGCCCAGCGTCGCACCGCCACCGCCACCGCCACCACAGCAGCAGCCGCAACCGCTGCATGCAGCACAGCATTTGGCGCAGCAGCAACAACAGCAAGCACAGCAACCGCCACCGCCGCCATACTTTCCGGCCGCAGCATTAGCTGCTTTGGCTGGCAGTCCGGCGGGACCGCATCATCCGGGTCTTTATAGCGCCGCGGGCGGTTTGCGTTTCCCGCCGCATCCAGGGCATCCGCATCCGCATTCGCATCCGCACGCCCACCATCCGCTGGGCAGTGCGTATACCACCGCCGAGGACGTGGTCCTCGCATCGGCCGTTGCCCATCAGCTGCATCCGGCGATGCGACCTCTGCGCGcCCTTCAGCCCgAGgAC
phenotype9popCF      AGCGTCTCGTCGCTGTTGACGGCGGGTAGCAACAACAACAACAGTATTAACGGTAGCGCAGCAGCAGCAGCGACGGCAGCAGCAGCAGCGGCAGCTCAGGCCTTAAGCTCACCAGATTCTGGAGCTGGCAATTATCGTAGCTCGCCGTCGCAGCTATCGCCACAAAGTAATCACAGCAATaaTAACAACAGTACTAACAACAACAACAACAACAACAATAGCAAAAATCACGAAGCTTTGAGCGTCTCACCCACAACAACAACAACAAATCGAACCACACCAACAACAACACCGCCAACACCACCGCCACAAGCAAGTGGAGCGCCAGCGCCACCACCACCACCGCCGTCGTCGTCGTCGTCATTACCCGCGCATCATTCGCCCAGCGTCGCACCGCCACCGCCACCGCCACCACAGCAGCAGCCGCAACCGCTGCATGCAGCACAGCATTTGGCGCAGCAGCAACAACAGCAAGCACAGCAACCGCCACCGCCGCCATACTTTCCGGCCGCAGCATTAGCTGCTTTGGCTGGCAGTCCGGCGGGACCGCATCATCCGGGTCTTTATAGCGCCGCGGGCGGTTTGCGTTTCCCGCCGCATCCAGGgCATCCGCATCCGCATTCGCATCCGCACGCCCACCATCCGCTGGGCAGTGCGTATACCACCGCCGAgGACGTGGTCCTCGCATCGGCCGTTGCCCATCAGCTGCATCCGGCGATGCGACCTCTGCGCGCCCTTCAGCCCGAGGAC
phenotype9popCF      AGCGTCTCGTCGCTGTTGACGGCGGGTAGCAACAACAACAACAGTATTAACGGTAGCGCAGCAGCAGCAGCGACGGCAGCAGCAGCAGCGGCAGCTCAGGCCTTAAGCTCACCAGATTCTGGAGCTGGCAATTATCGTAGCTCGCCGTCGCAGCTATCGCCACAAAGTAATCACAGCAATaaTAACAACAGTACTAACAACAACAACAACAACAACAATAGCAAAAATCACGAAGCTTTGAGCGTCTCACCCACAACAACAACAACAAATCGAACCACACCAACAACAACACCGCCAACACCACCGCCACAAGCAAGTGGAGCGCCAGCGCCACCACCACCACCGCCGTCGTCGTCGTCGTCATTACCCGCGCATCATTCGCCCAGCGTCGCACCGCCACCGCCACCGCCACCACAGCAGCAGCCGCAACCGCTGCATGCAGCACAGCATTTGGCGCAGCAGCAACaACAGCAAGCACAGCAACCGCCACCGCCGCCATACTTTCCGGCCGCAGCATTAGCTGCTTTGGCTGGCAGTCCGGCGGGACCGCATCATCCGGGTCTTTATAGCGCCGCGGGCGGTTTGCGTTTCCCGCCGCATCCAGGGCATCCGCATCCGCATTCGCAtCCGCACGCCCACCATCCGCTGGGCAGTGCGTATACCACCGCCGAGGACGTGGTCCTCGCATCGGCCGTTGCCCATCAGCTGCATCCGGCGATGCGACCTCTGCGCGCCCTTCAGCCCGAGGAC
phenotype5popCF      AGCGTCTCGTCGCTGTTGACGGCGGGTAGCAACAACAACAACAGTATTAACGGTAGCGCAGCAGCAGCAGCGACGGCAGCAGCAGCAGCGGCAGCTCAGGCCTTAAGCTCACCAGATTCTGGAGCTGGCAATTATCGTAGCTCGCCGTCGCAGCTATCGCCACAAAGTAATCACAGCAATaaTAACaACAGTACTAACAACAACAACAACAACAACAATAGCAAAAATCACGAAGCTTTGAGCGTCTCACCCACAACAACAACAACAAATCGAACCACACCAACAACAACACCGCCAACACCACCGCCACAAGCAAGTGGAGCGCCAGCGCCACCACCACCACCGCCGTCGTCGTCGTCGTCATTACCCGCGCATCATTCGCCCAGCGTCGCACCGCCACCGCCACCgCCACCACAGCAGCAGCCGCAACCGCTGCATGCAGCACAGCATTTGGCGCAGCAGCAACAACAGCAAGCACAGCAACCGCCACCGCCGCCATACTTTCCGGCCGCAGCATTAGCTGCTTTGGCTGGCAGTCCGGCGGGACCGCATCATCCGGGTCTTTATAGCGCCGCGGGCGGTTTGCGTTTCCCGCCGCATCCAGGGCATCCGCATCCGCATTCGCATCCGCACGCCCACCATCCGCTGGGCAGTGCGTATACCACCGCCGAGGACGTGGTCCTCGCATCGGCCGTTGCCCATCAGCTGCATCCGGCGATGCGACCTCTGCGCGCCCTTCAGCCCGAGGAC
phenotype3popCF      AGCGTCTCGTCGCTGTTGACGGCGGGTAGCAACAACAACAACAGTATTAACGGTAGCGCAGCAGCAGCAGCGACGGCAGCAGCAGCAGCGGCAGCTCAGGCCTTAAGCTCACCAGATTCTGGAGCTGGCAATTATCGTAGCTCGCCGTCGCAGCTATCGCCACAAAgTAATCACAGCAATaaTAACAACAGTaCTAACAACAACAACAACAACAACAATAGCAAAAATCACGAAGCTTTGAGCGTCTCACCCACAACAACAACAACAAATCGAACCACACCAACAACAACACCGCCAACACCACCGCCACAAGCAAGTGGAGCGCCAGCGCCACCACCACCACCGCCGTCGTCGTCGTCGTCATTACCCGCGCATCATTCGCCCAGCGTCGCACCGCCACCGCCACCGCCACCACAGCAGCAGCCGCAACCGCTGCATGCAGCACAGCATTTGGCGCAGCAGCAACAACAGCAAGCACAGCAACCGCCACCGCCGCCATACTTTCCGGCCGCAGCATTAGCTGCTTTGGCTGGCAGTCCGGCGGGACCGCATCATCCGGGTCTTTATAGCGCCGCGGGCGGTTtGCGTTTCCCGCCGCATCCAGGGCATCCGCATCCGCATTCGCATCCGCACGCCCACCATCCGCTGGGCAGTGCGTATACCACCGCCGAGGAcGTGGTCCTCGCATcGGCCGTtGCCCATcAGCTGCATCCGGCGATGCGACCTCTGCGCGCCCTTCAGCCCGAGGAC
phenotype3popCF      AGCGTCTCGTCGCTGTTGACGGCGGGTAGCAACAACAACAACAGTATTAACGGTAGCGCAGCAGCAGCAGCGACGGCAGCAGCAGCAGCGGCAGCTCAGGCCTTAAGCTCACCAGATTCTGGAGCTGGCAATTATCGTAGCTCGCCGTCGCAGCTATCGCCACAAAgTAATCACAGCAATaaTAACAACAGTACTAACAACAACAACAACAACAACAATAGCAAAAATCACGAAGCTTTGAGCGTCTCACCCACAACAACAACAACAAATCGAACCACACCAACAACAACACCGCCAACACCACCGCCACAAGCAAGTGGAGCGCCAGCGCCACCACCACCACCGCCGTCGTCGTCGTCGTCATTACCCGCGCATCATTCGCCCAGCGTCGCACCGCCACCGCCACCGCCACCACAGCAGCAGCCGCAACCGCTGCATGCAGCACAGCATTTGGCGCAGCAGCAACAACAGCAAGCACAGCAACCGCCACCGCCGCCATACTTTCCGGCCGCAGCATTAGCTGCTTTGGCTGGCAGTCCGGCGGGACCGCATCATCCGGGTCTTTATAGCGCCGCGGGCGGTTTGCGTTTCCCGCcGCATCCAgGGCATCCGCATCCGCATTCGCATCCGCACGCCCACCATCCGCTGGGCAGTGCGTATACCACCGCCGAGGACGTGGTCCTCGCATcGGCCGTTGCCCATCAGCTGCATCCGGCGATGCGACCTCTGCGCGCCCTTCAGCCCGAGGAC
phenotype5popCF      AGCGTCTCGTCGCTGTTGACGGCGGGTAGCAACAACAACAACAGTATTAACGGTAGCGCAGCAGCAGCAGCGACGGCAGCAGCAGCAGCGGCAGCTCAGGCCTTAAGCTCACCAGATTCTGGAGCTGGCAATTATCGTAGCTCGCCGTCGCAGCTATCGCCACAAAgTAATCACAGCAATaaTAACAACAGTACTAACAACAACAACAACAACAACAATAGCAAAAATCACGAAGCTTTGAGCGTCTCACCCACAACAACAACAACAAATCGAACCACACCAACAACAACACCGcCAACACCACCGCCACAAGCAAGTGGAGCGCCAGCGCCACCACCACCACCGCCGTCGTCGTCGTCGTCATTACCCGCGCATCATTCGCCCAGCGTCGCACCGCCACCGCCACCGCCACCACAGCAGCAGCCGCAACCGCTGCATGCAGCACAGCATTTGGCGCAGCAGCAACAACAGCAAGCACAGCAACCGCCACCGCCGCCATACTTTCCGGCCGCAGCATTAGCTGCTTTGGCTGGCAGTCCGGCGGGACCGCATCATCCGGGTCTTTATAGCGCCGCGGGCGGTTTGCGTTTCCCGCCGCATCCAGGGCATCCGCATCCGCATTCGCATCCGCACGCCCACCATCCGCTGGGCAGTGCGTATACCACCGCCGAGGACGTGGTCCTCGCATCGGCCGTTGCCCATCAGCTGCATCCGGCGATGCGACcTCTGCGCGCCcTTCAGCCcGAGGAC
phenotype7popCF      AGCGTCTCGTCGCTGTTGACGGCGGGTAGCAACAACAACAACAGTATTAACGGTAGCGCAGCAGCAGCAGCGACGGCAGCAGCAGCAGCGGCAGCTCAGGCCTTAAGCTCACCAGATTCTGGAGCTGGCAATTATCGTAGCTCGCCGTCGCAGCTATcGcCACAAAGTAATCACAGCAATAATAACAACAGTACTAACAACAACAACAACAACAACAATAGCAAAAATCACGAAGCTTTGAGCGTCTCACCCACAACAACAACAACAAATAGAACCACACCAACAACAACACCGCCAACACCACCGCCACAAGCAAGTGGAGCGCCAGCGCCACCACCACCACCGCCGTCGTCGTCGTCGTCATTACCCGCGCATCATTCGCCCAGCGTCGCACCGCCGCCGCCACCGCCACCACAGCAGCAGCCGCAACCGCTGCATGCAGCACAGCATTTGGCGCAGCAGCAACAACAGCAAGCACAGCAACCGCCACCGCCGCCATACTTTCCGGCCGCAGCATTAGCTGCTTTGGCTGGCAGTCCGGCGGGACCGCATCATCCGGGTCTTTATAGCGCCGCGGGCGGTTTGCGTTTCCCGCCGCATCCAGGgCATCCGCATCCGCATTCGCATCCGCACGCCCACCATCCGCTGGGCAGTGCGTATACCACCGCCGAgGACGTGGTCCTCGCATCGGCCGTTGCCCATCAGCTGCATCCGGCGATGCGACCTCTGCGCGCCCTTCAGCCCGAGGAC
;
End
;
